# Supplementary material
Source: ML conference proceedings conference paper supplement (https://openreview.net/forum?id=pyDAihUMKV)
Supplement: supplementary_material [file Update_technical_appendices.pdf › Update_technical_appendices.pdf]

---

# [Technical Appendix Updated] Relaxing partition admissibility in Cluster-DAGs: a causal calculus with arbitrary variable clustering

---

Anonymous Author(s)

Affiliation

Address

email

## Abstract

Cluster DAGs (C-DAGs) provide an abstraction of causal graphs in which nodes represent clusters of variables, and edges encode both cluster-level causal relationships and dependencies arisen from unobserved confounding. C-DAGs define an equivalence class of acyclic causal graphs that agree on cluster-level relationships, enabling causal reasoning at a higher level of abstraction. However, when the chosen clustering induces cycles in the resulting C-DAG, the partition is deemed inadmissible under conventional C-DAG semantics. In this work, we extend the C-DAG framework to support arbitrary variable clusterings by relaxing the partition admissibility constraint, thereby allowing cyclic C-DAG representations. We extend the notions of d-separation and causal calculus to this setting, significantly broadening the scope of causal reasoning across clusters and enabling the application of C-DAGs in previously intractable scenarios. Our calculus is both sound and atomically complete with respect to the do-calculus: all valid interventional queries at the cluster level can be derived using our rules, each corresponding to a primitive do-calculus step.

Knowing the effect of a treatment  $X$  on an outcome  $Y$ , encoded by an intervention  $do(X)$  in the interventional distribution  $P(Y|do(X))$ , is crucial in many applications. However, performing interventions is often impractical due to ethical concerns, potential harm or prohibitive costs. In such cases, one can instead aim to identify do-free formulas that estimate the effects of interventions using only observational (non-experimental) data and a causal graph (Pearl, 2009). Solving the identifiability problem typically involves establishing graphical criteria under which the total effect is identifiable, and providing a do-free formula for estimating it from observational data. However, specifying a causal diagram requires prior knowledge of the causal relationships between all observed variables, a requirement that is often unmet in real-world applications. This challenge is particularly acute in complex, high-dimensional settings, limiting the practical applicability of causal inference methods.

One way to circumvent this difficulty is to rely on abstract representations which group several variables into macro-variables, a mapping usually referred to as causal representation learning (Schölkopf et al., 2021), which are connected through causal relationships and dependencies arisen from unobserved confounding. Several studies have been devoted to causal discovery of and causal inference in specific abstract representations, both for static and dynamic (time series) variables, as Assaad et al. (2022); Ferreira and Assaad (2024); Anand et al. (2023); Wahl et al. (2023). Recent studies have also tackled the related problem of defining mappings from clusters to variables while preserving specific causal properties (Chalupka et al., 2015, 2016; Rubenstein et al., 2017; Beckers and Halpern, 2019), and have provided a thorough theoretical analysis of the relationship between micro- and macro-level causal models with a view on causal discovery assumptions (Wahl et al., 2024).

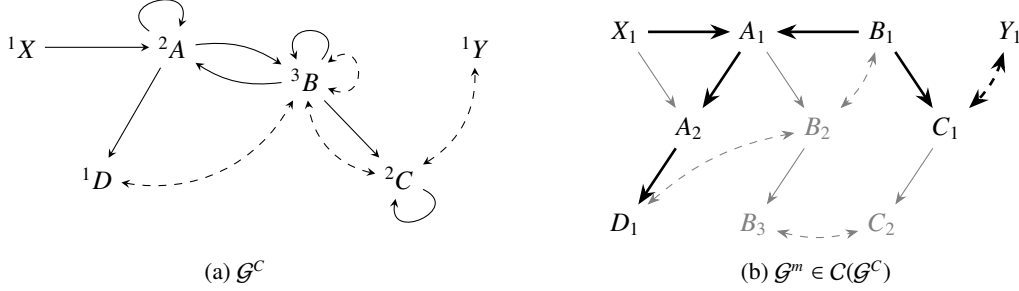

Figure 1: Left: a C-DAG  $\mathcal{G}^C = (\mathcal{V}^C, \mathcal{E}^C)$ , Right: a graph  $\mathcal{G}^m = (\mathcal{V}^m, \mathcal{E}^m)$  that is compatible with  $\mathcal{G}^C$ . For example,  ${}^2A \in \mathcal{V}^C$  corresponds to  $\{A_1, A_2\} \subseteq \mathcal{V}^m$ . In  $\mathcal{G}^m$ , a *structure of interest* (Definition 3) is highlighted in **bold black**, with all other nodes and edges shown in gray.

The starting point of our study is the framework recently proposed in Anand et al. (2023), which relaxes the strict requirement of a fully specified causal diagram and provides a foundation for valid inference over clusters of variables. However, it focuses on abstract graphs, called Cluster-DAGs, which do not contain cycles between clusters, a restriction known as *partition admissibility*. We extend this framework in this paper by removing this restriction and consider arbitrary clusterings of variables, potentially resulting in abstract graphs with self-loops and cycles between clusters.

To tackle identification in causal abstractions, recent work has introduced separation criteria that generalize d-separation to specific abstraction types (Jaber et al., 2022; Perković et al., 2018; Ferreira and Assaad, 2025). While effective, this has led to a proliferation of abstraction-specific rules. Yet, all these methods operate over the same underlying object: the class of graphs compatible with the abstraction. An alternative line of work could seek to construct a transformed graph on which standard d-separation can be directly applied. This is feasible, for example, when the union of all compatible graphs is itself compatible — but such cases are rare, especially when the abstraction introduces cycles. Our approach adopts a hybrid strategy. Rather than relying solely on path-based d-separation, we define a structure-based criterion that captures all necessary information for assessing separation. These structures avoid pitfalls such as reattaching colliders into conditioned paths and are simple to construct — typically by tracing backward along directed edges from root nodes. Crucially, our criterion remains tightly aligned with standard d-separation: every d-connecting path can define such a structure, and every connecting structure contains a d-connecting path. To support identification under abstraction, we introduce a two-step method grounded in a tractable search space. First, we derive an extended graph from the abstraction that, while not necessarily compatible, conservatively includes all potentially connecting structures. This enables efficient exploration using standard graph-traversal techniques. Second, a lightweight compatibility test is applied to filter out invalid structures, *i.e.*, those which do not correspond to any graph in the compatible class.

Specifically, we make the following contributions:

1. We extend the framework of Anand et al. (2023) by removing the assumption of partition admissibility, thereby broadening its applicability to a wider range of causal abstractions.
2. We reformulate the d-separation criterion in an ADMG using a structure-based separation criterion that remains faithful to classical d-separation.
3. We introduce a calculus which is sound and atomically complete.
4. We further show that any cluster can be reduced to a cluster of limited size, leading to efficient calculus rules.

The remainder of the paper is structured as follows: Section 1 introduces the main notions while Section 2 presents our main result regarding sound and atomically complete calculus; Section 3 presents an efficient way to look at causal abstractions based on clusters; lastly, Section 4 discusses some extensions of our work while Section 5 concludes the paper. All proofs are provided in the Technical Appendices.

## 74 1 Preliminaries

75 We follow the notations of Pearl (2009). A single variable is denoted by an uppercase letter  $X$  and its  
76 realized value by a small letter  $x$ . A calligraphic uppercase letter  $\mathcal{X}$  denotes a set.

77 **Graphs.** We denote by  $\text{Anc}(\mathcal{X}, \mathcal{G})$  and  $\text{Desc}(\mathcal{X}, \mathcal{G})$  the sets of ancestors and descendants of  $\mathcal{X}$  in  
78 the graph  $\mathcal{G}$ , respectively. We denote by  $\text{Root}(\mathcal{G})$  the set of roots of  $\mathcal{G}$ , i.e., the vertices that have no  
79 child in  $\mathcal{G}$ . A vertex  $V$  is said to be *active* on a path relative to  $\mathcal{Z}$  if 1)  $V$  is a collider and  $V$  or any of  
80 its descendants are in  $\mathcal{Z}$  or 2)  $V$  is a non-collider and is not in  $\mathcal{Z}$ . A path  $\pi$  is said to be *active* given  
81 (or conditioned on)  $\mathcal{Z}$  if every vertex on  $\pi$  is active relative to  $\mathcal{Z}$ . Otherwise,  $\pi$  is said to be *inactive*  
82 given  $\mathcal{Z}$ . Given a graph  $\mathcal{G}$ , the sets  $\mathcal{X}$  and  $\mathcal{Y}$  are said to be d-separated by  $\mathcal{Z}$  if every path between  
83  $\mathcal{X}$  and  $\mathcal{Y}$  is inactive given  $\mathcal{Z}$ . We denote this by  $\mathcal{X} \perp_{\mathcal{G}} \mathcal{Y} \mid \mathcal{Z}$ . Otherwise,  $\mathcal{X}$  and  $\mathcal{Y}$  are d-connected  
84 given  $\mathcal{Z}$ , which we denote by  $\mathcal{X} \not\perp_{\mathcal{G}} \mathcal{Y} \mid \mathcal{Z}$ . The mutilated graph  $\mathcal{G}_{\overline{\mathcal{X}}\mathcal{Z}}$  is the result of removing from  
85 a graph  $\mathcal{G}$  edges with an arrowhead into  $\mathcal{X}$  (e.g.,  $A \rightarrow \mathcal{X}$ ,  $A \leftrightarrow \mathcal{X}$ ), and edges with a tail from  $\mathcal{Z}$   
86 (e.g.,  $A \leftarrow \mathcal{Z}$ ). Let  $\pi$  be a path in a graph  $\mathcal{G}$  and let  $A$  and  $B$  be two nodes of  $\pi$ . We denote by  $\pi_{[A,B]}$ ,  
87 the subpath of  $\pi$  between  $A$  and  $B$ . For two graphs  $\mathcal{G}_1 = (\mathcal{V}_1, \mathcal{E}_1)$  and  $\mathcal{G}_2 = (\mathcal{V}_2, \mathcal{E}_2)$ , the union is  
88  $\mathcal{G}_1 \cup \mathcal{G}_2 := (\mathcal{V}_1 \cup \mathcal{V}_2, \mathcal{E}_1 \cup \mathcal{E}_2)$ .

89 **Structural Causal Models.** Formally, a Structural Causal Model (SCM)  $\mathcal{M}$  is a 4-tuple  
90  $\langle \mathcal{U}, \mathcal{V}, \mathcal{F}, P(\mathcal{U}) \rangle$ , where  $\mathcal{U}$  is a set of exogenous (latent) mutually independent variables and  $\mathcal{V}$   
91 is a set of endogenous (measured) variables.  $\mathcal{F}$  is a collection of functions  $\{f_i\}_{i=1}^{|\mathcal{V}|}$  such that each  
92 endogenous variable  $V_i \in \mathcal{V}$  is a function  $f_i \in \mathcal{F}$  of  $\mathcal{U}_i \cup \text{Pa}(V_i)$ , where  $\mathcal{U}_i \subseteq \mathcal{U}$  and  $\text{Pa}(V_i) \subseteq \mathcal{V} \setminus V_i$ .  
93 The uncertainty is encoded through a probability distribution over the exogenous variables,  $P(\mathcal{U})$ .  
94 Each SCM  $\mathcal{M}$  induces a directed acyclic graph (DAG) with bidirected edges – or an acyclic directed  
95 mixed graph (ADMG) –  $G(\mathcal{V}, \mathcal{E} = (\mathcal{E}_D, \mathcal{E}_B))$ , known as a *causal diagram*, that encodes the structural  
96 relations among  $\mathcal{V} \cup \mathcal{U}$ , where every  $V_i \in \mathcal{V}$  is a vertex. We potentially distinguish edges  $\mathcal{E}$  into  
97 directed edges  $\mathcal{E}_D$ , which connect each variable  $V_i \in \mathcal{V}$  to its parents  $V_j \in \text{Pa}(V_i)$  as  $(V_j \rightarrow V_i)$ ,  
98 and bidirected edges, which appear as dashed edges  $(V_j \leftrightarrow V_i)$  between variables  $V_i, V_j \in \mathcal{V}$  that  
99 share a common exogenous parent, i.e., such that  $\mathcal{U}_i \cap \mathcal{U}_j \neq \emptyset$ . Performing an intervention  $\mathcal{X}=x$  is  
100 represented through the do-operator,  $\text{do}(\mathcal{X}=x)$ , which represents the operation of fixing a set  $\mathcal{X}$  to a  
101 constant  $x$ , and induces a submodel  $\mathcal{M}_{\mathcal{X}}$ , which is  $\mathcal{M}$  with  $f_{\mathcal{X}}$  replaced to  $x$  for every  $X \in \mathcal{X}$ . The  
102 post-interventional distribution induced by  $\mathcal{M}_{\mathcal{X}}$  is denoted by  $P(\mathcal{V} \setminus \mathcal{X} | \text{do}(\mathcal{X}))$ .

103 **Cluster-DAGs** In this study, we further develop the Cluster-DAG framework introduced in Anand  
104 et al. (2023). The individual variables, called micro-variables and denoted by  $\mathcal{V}^m$ , are grouped into  
105 clusters forming a partition  $\mathcal{V}^C$ , where each cluster contains one or more micro-variables.

106 **Definition 1** (Cluster-DAG). Let  $\mathcal{G}^m = (\mathcal{V}^m, \mathcal{E}^m)$  be an ADMG and let  $\mathcal{V}^C$  be a partition of  $\mathcal{V}^m$ . We  
107 construct the mixed graph  $\mathcal{G}^C = (\mathcal{V}^C, \mathcal{E}^C)$ , possibly with self-loops and cycles, by defining  $\mathcal{E}^C$  as  
108 follows. For all clusters  $V, W \in \mathcal{V}^C$ :

- 109 •  $V \rightarrow W$  is in  $\mathcal{E}^C$  if and only if there exists  $V_v$  in  $V$  and  $W_w$  in  $W$  such that  $V_v \rightarrow W_w$  in  $\mathcal{G}^m$ .
- 110 •  $V \leftrightarrow W$  is in  $\mathcal{E}^C$  if and only if there exists  $V_v$  in  $V$  and  $W_w$  in  $W$  such that  $V_v \leftrightarrow W_w$  in  $\mathcal{G}^m$ .

111 We say that  $\mathcal{G}^m$  and  $\mathcal{G}^C$  are compatible.

112 A key novelty of our approach is the allowance of cycles at the cluster level, in contrast to Anand et al.  
113 (2023), which restricts the cluster graph to be acyclic. We nonetheless retain the term “Cluster-DAG”  
114 (C-DAG) to emphasize that the underlying graph on micro-variables remain acyclic. We denote  
115 a node in  $\mathcal{G}^C$  by  $V^C$ , and its corresponding set of micro-variables in a compatible graph  $\mathcal{G}^m$  by  
116  $V^m = \{V_1, \dots, V_{\#V}\}$  where the indices follow the topological ordering induced by  $\mathcal{G}^m$ . We will use the  
117 same notations for any intersection or union of clusters. The cardinality of each cluster is displayed  
118 in the upper left corner of its corresponding node, as represented in Figure 1a.

119 A C-DAG  $\mathcal{G}^C$  is, by definition, derived from an ADMG over the micro-variable set  $\mathcal{V}^m$ ; however, in  
120 practical applications the true causal diagram on  $\mathcal{V}^m$  is typically unknown. Then, we are interested in  
121 all the ADMGs compatible with  $\mathcal{G}^C$ .

**Definition 2** (Class of Compatible Graphs). Let  $\mathcal{V}^C$  be a partition of  $\mathcal{V}^m$ , and  $\mathcal{G}^C$  be a mixed graph on  $\mathcal{V}^C$ . We denote  $C(\mathcal{G}^C) := \{\mathcal{G}^m \mid \mathcal{G}^m \text{ is compatible with } \mathcal{G}^C\}$  the equivalence class<sup>1</sup> of graphs compatible with  $\mathcal{G}^C$ .

A C-DAG is a valid causal abstraction of any underlying causal diagram on micro-variables if and only if it contains no directed cycle composed entirely of singleton clusters, which ensure the existence of at least one ADMG compatible with the mixed graph (see Proposition 4 in Appendix).

## 2 A Causal Calculus for Cyclic C-DAGs

We now introduce an atomically complete calculus for reasoning about cluster queries in C-DAGs. For each rule of Pearl’s calculus, Theorem 2 gives a graphical criterion that is sound and complete (Theorem 3): if the separation criterion for a given rule applies, then the rule is valid in all compatible graphs; if not, then there is at least one compatible graph in which the rule fails. Our work is constructive: if such a graph exists, then our criterion enables its construction. To establish Theorems 2 and 3, we first introduce the concept of *structure of interest*, then describe the associated graphs needed to define efficiently our calculus, and finally define the corresponding calculus in the third subsection.

### 2.1 Structure of interest

Demonstrating that a rule of Pearl’s calculus fails on a compatible graph (at least one) requires exhibiting a graph on micro-variables in which the corresponding d-separation fails. Concretely, this involves the three following steps on the micro-variables, for a given C-DAG: (i) find a path connecting variables; (ii) for each collider on that path, provide a directed path to a conditioning variable; and (iii) ensure all these paths coexist in a single compatible graph. While (i)–(ii) could be decided via a graphical test on the C-DAG, step (iii) is nontrivial since paths may conflict and form cycles. To avoid this, we directly look at *structures of interest*, which correspond to paths to which we add for each collider a directed path to a conditioning variable. Thus, we only need to test that this structure of interest connects two sets of variables. Definitions 3 and 4 refine and formalize this intuition.

**Definition 3.** A structure of interest  $\sigma$  is an ADMG, with a single connected component, in which each node  $V$  satisfies the following property:

- $V$  has at most one outgoing arrow, or,
- $V$  has two outgoing arrows but no incoming arrow.

In an ADMG, executing a breadth-first search from the root set against the arrow orientation produces a subgraph that, by construction, satisfies the first condition of Definition 3. Moreover, by enforcing the second condition at each exploration step, one obtains an efficient procedure for constructing the desired structures of interest within the ADMG.

Figure 5 in Appendix shows how arrows look like around a vertex in a structure of interest. We draw in Figure 1b in bold an example of a structure of interest in a graph on micro-variables.

**Definition 4.** Let  $\mathcal{G} = (\mathcal{V}, \mathcal{E})$  be a mixed graph. Let  $X, Y, Z$  be pairwise disjoint subsets of  $\mathcal{V}$ . We say that a structure of interest  $\sigma \subseteq \mathcal{G}$  connects  $X$  and  $Y$  under  $Z$  and we write  $X \perp\!\!\!\perp_{\sigma} Y \mid Z$  if the following conditions hold:

- $X \cap \sigma \neq \emptyset$  and  $Y \cap \sigma \neq \emptyset$  ( $\sigma$  connects  $X$  and  $Y$ )
- $\text{Root}(\sigma) \subseteq Z \cup X \cup Y$  and (all vertices of  $\sigma$  are ancestors of  $Z \cup X \cup Y$ )
- $(\sigma \setminus \text{Root}(\sigma)) \cap Z = \emptyset$  (neither chains nor forks of  $\sigma$  are in  $Z$ )

**Example 1.** Let us consider the graph  $\mathcal{G}^m$  and the structure of interest  $\sigma^m$  depicted in Figure 1b. The roots of  $\sigma^m$  are  $\text{Root}(\sigma^m) = \{D_1, C_1, Y_1\}$ . According to Definition 4,  $\sigma^m$  connects  $X_1$  and  $Y_1$  under  $C^m \cup D^m = \{C_1, C_2, D_1\}$ . Indeed,  $\sigma^m$  contains the path  $\pi^m = \langle X_1, A_1, B_1, C_1, Y_1 \rangle$  which d-connects  $X_1$  and  $Y_1$  under  $C^m \cup D^m$  in  $\mathcal{G}^m$ .

<sup>1</sup>If we denote  $\phi(\mathcal{G}^m; \mathcal{V}^C)$  the cluster-DAG obtained from  $\mathcal{G}^m$  via Definition 1, the equivalence relation is given by  $\mathcal{G}_1^m \sim_{\mathcal{V}^C} \mathcal{G}_2^m \Leftrightarrow \phi(\mathcal{G}_1^m; \mathcal{V}^C) = \phi(\mathcal{G}_2^m; \mathcal{V}^C)$ .

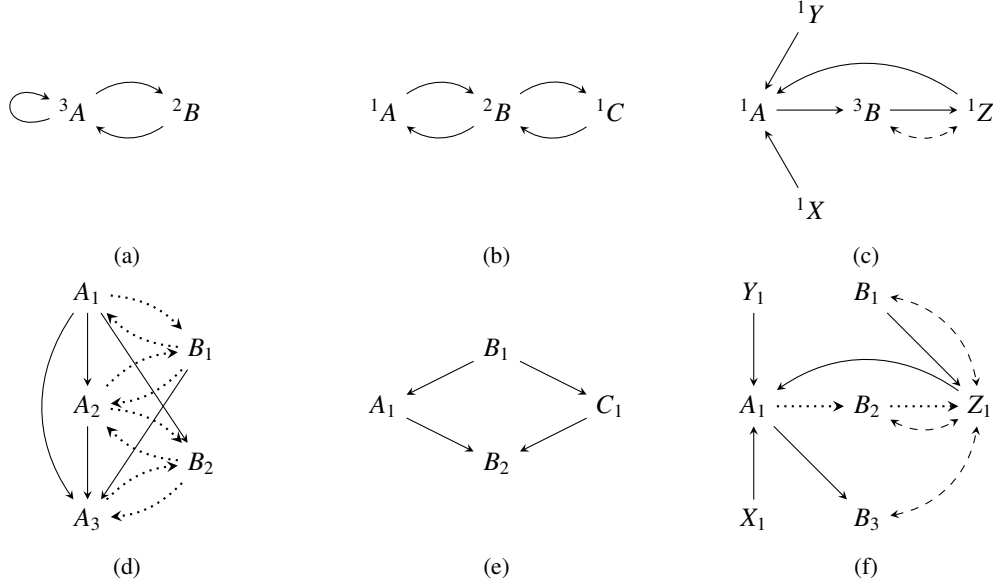

Figure 2: On the first row (Figures 2a, 2b and 2c), three examples of C-DAG are given. On the second row (respectively, Figures 2d, 2e and 2f), we represent the corresponding unfolded and canonical compatible graphs. The plain and dashed arrows corresponds to  $\mathcal{G}_{can}^m$ , whereas the dotted arrows represent the "eligible" arrows. Lemma 2 and Figure 2e show that there is no graph compatible with the C-DAG depicted in Figure 2b such that  $A_1$  and  $C_1$  are connected by a directed path. Similarly, Proposition 3 and Figure 2f show that there is no graph  $\mathcal{G}^m$  compatible with the C-DAG depicted in Figure 2c such that  $A_1 \in \text{Anc}(Z_1, \mathcal{G}^m)$ .

We remark that a path is always a structure of interest, but it may not be a connecting structure of interest. Theorem 1 shows that there exists a d-connecting path if and only if there exists a connecting structure of interest.

**Theorem 1** (D-connection with structures of interests). *Let  $\mathcal{G}$  be an ADMG. Let  $\mathcal{X}, \mathcal{Y}, \mathcal{Z}$  be pairwise disjoint subsets of nodes of  $\mathcal{G}$ . The following properties are equivalent:*

1.  $\mathcal{X} \not\perp_{\mathcal{G}} \mathcal{Y} \mid \mathcal{Z}$ .
2.  $\mathcal{G}$  contains a structure of interest  $\sigma$  such that  $\mathcal{X} \not\perp_{\sigma} \mathcal{Y} \mid \mathcal{Z}$ .

Theorem 1 reduces the problem of determining whether a rule from Pearl's calculus fails for a given C-DAG to the search for a compatible graph which contains a *structure of interest* that violates the corresponding d-separation.

## 2.2 Associated graphs

Enumerating all compatible graphs is generally infeasible due to their potentially large number. To address this challenge, we define two mixed graphs. The canonical compatible graph (Definition 5) allows efficient verification of whether given structures of interest exist in some compatible graph. The unfolded graph (Definition 6) aggregates all structures of interest present in at least one compatible graph. To look for a structure of interest, we first check in the unfolded graph. However, since it may include spurious structures that do not correspond to any actual compatible graph, we afterward filter out these spurious structures from the canonical compatible graph.

**Definition 5** (Canonical Compatible Graph). *Let  $\mathcal{G}^C$  be a C-DAG. Its corresponding canonical compatible graph is the ADMG  $\mathcal{G}_{can}^m = (\mathcal{V}_{can}^m, \mathcal{E}_{can}^m)$ , where the set of nodes is  $\mathcal{V}_{can}^m := \mathcal{V}^m$ , and the set of edges is constructed by the following procedure:*

1. For all dashed-bidirected-arrows  $V^C \leftrightarrow W^C$  in  $\mathcal{G}^C$ , add the dashed-bidirected-arrows  $V_v \leftrightarrow W_w$  for all  $v, w \in \{1, \dots, \#V^C\} \times \{1, \dots, \#W^C\}$  such that  $V_v \neq W_w$ .

- 191 2. For all self-loop  $\mathcal{C}^V$ , add the arrow  $V_i \rightarrow V_j$  for all  $i, j \in \{1, \dots, \#V^C\}^2$  such that  $i < j$ .
- 192 3. For all arrows  $V^C \rightarrow W^C$ , with  $V^C \neq W^C$ , add the arrow  $V_1 \rightarrow W_{\#W^C}$ .

193 Examples of canonical compatible graphs are given in Figure 2. As stated in Proposition 1, the  
 194 canonical compatible graph is itself compatible and canonical in the sense that it can be added to any  
 195 compatible graph without violating compatibility.

196 **Proposition 1.** *Let  $\mathcal{G}^C$  be a C-DAG and  $\mathcal{G}_{can}^m$  be its corresponding canonical compatible graph. Then,*  
 197 *the following properties hold:*

- 198 1.  $\mathcal{G}_{can}^m \in C(\mathcal{G}^C)$ .
- 199 2. For all  $\mathcal{G}^m \in C(\mathcal{G}^C)$ ,  $\mathcal{G}_{can}^m \cup \mathcal{G}^m \in C(\mathcal{G}^C)$ .

200 Consequently, if a structure of interest exists in some compatible graph, it must also coexist with the  
 201 canonical compatible graph, meaning that its addition to the canonical compatible graph does not  
 202 create cycles<sup>2</sup>.

203 We now introduce the unfolded graph.

204 **Definition 6** (Unfolded graph). *Let  $\mathcal{G}^C$  be a C-DAG and  $\mathcal{G}_{can}^m = (\mathcal{V}_{can}^m, \mathcal{E}_{can}^m)$  be its corresponding*  
 205 *canonical compatible graph. Its corresponding unfolded graph is  $\mathcal{G}_u^m = (\mathcal{V}_u, \mathcal{E}_u)$ , the mixed graph*  
 206 *defined by the following procedure:*

- 207 •  $\mathcal{V}_u := \mathcal{V}^m$ .
- 208 • Let us consider the following set:

$$\mathcal{E}_{eligible} := \left\{ V_v \rightarrow W_w \mid \left\{ \begin{array}{l} V^C \rightarrow W^C \subseteq \mathcal{G}^C, \text{ and,} \\ \mathcal{G}_{can}^m \cup \{V_v \rightarrow W_w\} \text{ is acyclic.} \end{array} \right. \right\}$$

209 Then  $\mathcal{E}_u := \mathcal{E}_{can}^m \cup \mathcal{E}_{eligible}$ .

210 Examples of unfolded graphs are given in Figure 2. As shown in Proposition 2, the unfolded graph  
 211 is a supergraph of any compatible graph. Therefore, if there exists a compatible graph containing a  
 212 structure of interest  $\sigma^m$ , it follows that  $\sigma^m$  must also appear in the unfolded graph. This implies that  
 213 it is no longer necessary to enumerate all compatible graphs in the search for a structure of interest;  
 214 instead, it suffices to search within the unfolded graph alone. Figure 2 illustrates how the unfolded  
 215 graph can be used to demonstrate the non-existence of certain structures within the set of compatible  
 216 graphs.

217 **Proposition 2.** *Let  $\mathcal{G}^C$  be a C-DAG and  $\mathcal{G}_u^m$  be its corresponding unfolded graph. Then, any*  
 218 *compatible graph  $\mathcal{G}^m$  is a subgraph of  $\mathcal{G}_u^m$  up to a permutation of indices in each cluster.*

219 The unfolded graph defines the search space for the structures of interest, while the canonical  
 220 compatible graph, as stated in Proposition 3, ensures that these structures can indeed be realized  
 221 within a compatible graph.

222 **Proposition 3.** *Let  $\mathcal{G}^C$  be a C-DAG and  $\mathcal{G}_u^m$  be its corresponding unfolded graph. Let  $\sigma^m$  be a*  
 223 *structure of interest in  $\mathcal{G}_u^m$ . If  $\mathcal{G}_{can}^m \cup \sigma^m$  is acyclic, then  $\mathcal{G}_{can}^m \cup \sigma^m$  is compatible with  $\mathcal{G}^C$ .*

224 By keeping these two notions distinct, we are able to apply mutilations directly on the unfolded graph  
 225 without restricting the overall class of compatible graphs.

## 226 2.3 Calculus

227 It is important to note that mutilating all graphs compatible with a C-DAG generally yields a strictly  
 228 smaller set of graphs than the set of graphs compatible with the mutilated C-DAG, as illustrated in  
 229 Example 2.<sup>3</sup> This means that one cannot do the do-calculus on the class of graphs defined by the  
 230 mutilated C-DAG.

<sup>2</sup>Let  $\sigma^m \subseteq \mathcal{G}^m$ . Since  $\mathcal{G}^m \cup \mathcal{G}_{can}^m$  is acyclic,  $\sigma^m \cup \mathcal{G}_{can}^m$  is also acyclic.

<sup>3</sup>A similar phenomenon was observed by Zhang (2008) in the context of ancestral graphs.

231 **Example 2.** Let us consider the C-DAG  $\mathcal{G}^C := {}^2A \rightleftarrows {}^1B$ . We have the following identities:

$$\begin{aligned}
 232 \quad & \bullet \left\{ \mathcal{G}_{\underline{B_1}}^m \mid \mathcal{G}^m \in C(\mathcal{G}^C) \right\} = \left\{ \begin{array}{cc} A_1 \rightarrowtail B_1, & A_1 \\ A_2 & A_2 \rightarrow B_1 \end{array} \right\} \\
 233 \quad & \bullet C(\mathcal{G}_{\underline{B_1}}^C) = \left\{ \begin{array}{ccc} A_1 \rightarrowtail B_1, & A_1 & A_1 \rightarrow B_1 \\ A_2 & A_2 \rightarrow B_1, & A_2 \rightarrow B_1 \end{array} \right\}
 \end{aligned}$$

234 And then,  $\left\{ \mathcal{G}_{\underline{B_1}}^m \mid \mathcal{G}^m \in C(\mathcal{G}^C) \right\} \subsetneq C(\mathcal{G}_{\underline{B_1}}^C)$ .

235 However, thanks to the unfolded graph and the canonical compatible graph, the rules of do-calculus  
 236 for cluster queries can be encoded in a sound and complete manner. This principle is formally  
 237 established in Theorems 2 and 3. An illustrative application of Theorem 2 is provided in Example 3  
 238 (a complementary example is provided in Figure 8 in Appendix).

239 **Theorem 2** (Calculus). Let  $\mathcal{G}^C$  be a C-DAG and let  $\mathcal{G}_u^m$  be its corresponding unfolded graph. Let  
 240  $\mathcal{X}^C, \mathcal{Y}^C, \mathcal{Z}^C, \mathcal{W}^C$  be pairwise distinct subsets of nodes. Then for any density  $P$  compatible with any  
 241 compatible graph, the following rules apply:

- $$\begin{aligned}
 242 \quad & R1. P(\mathbf{y}^m \mid do(\mathbf{w}^m), \mathbf{x}^m, \mathbf{z}^m) = P(\mathbf{y}^m \mid do(\mathbf{w}^m), \mathbf{z}^m) \text{ if } \mathcal{G}_{u, \overline{\mathcal{W}^m}}^m \text{ does not contain a structure of} \\
 243 \quad & \text{interest } \sigma^m \text{ such that } \mathcal{X}^m \not\perp_{\sigma^m} \mathcal{Y}^m \mid \mathcal{W}^m, \mathcal{Z}^m \text{ and } \mathcal{G}_{can}^m \cup \sigma^m \text{ is acyclic.} \\
 244 \quad & R2. P(\mathbf{y}^m \mid do(\mathbf{w}^m), do(\mathbf{x}^m), \mathbf{z}^m) = P(\mathbf{y}^m \mid do(\mathbf{w}^m), \mathbf{x}^m, \mathbf{z}^m) \text{ if } \mathcal{G}_{u, \overline{\mathcal{W}^m}, \mathcal{X}^m}^m \text{ does not contain a} \\
 245 \quad & \text{structure of interest } \sigma^m \text{ such that } \mathcal{X}^m \not\perp_{\sigma^m} \mathcal{Y}^m \mid \mathcal{W}^m, \mathcal{Z}^m \text{ and } \mathcal{G}_{can}^m \cup \sigma^m \text{ is acyclic.} \\
 246 \quad & R3. P(\mathbf{y}^m \mid do(\mathbf{w}^m), do(\mathbf{x}^m), \mathbf{z}^m) = P(\mathbf{y}^m \mid do(\mathbf{w}^m), \mathbf{z}^m) \text{ if } \mathcal{G}_{u, \overline{\mathcal{W}^m}}^m \text{ does not contain a structure} \\
 247 \quad & \text{of interest } \sigma^m \text{ such that } \mathcal{X}^m \not\perp_{\sigma^m} \mathcal{Y}^m \mid \mathcal{W}^m, \mathcal{Z}^m, \mathcal{G}_{can}^m \cup \sigma^m \text{ is acyclic and } \text{Root}(\sigma^m) \subseteq \\
 248 \quad & (\mathcal{W}^m \cup \mathcal{Z}^m) \cup \mathcal{Y}^m.
 \end{aligned}$$

249 The first two rules of Theorem 2 are very similar to the first two rules of Pearl's do-calculus. In contrast,  
 250 the third rule of Pearl's do-calculus requires verifying the d-separation condition  $\mathcal{Y}^m \perp_{\mathcal{G}_{u, \overline{\mathcal{W}^m}, \mathcal{X}^m(\mathcal{Z}^m)}}^m \mathcal{X}^m \mid$   
 251  $\mathcal{W}^m, \mathcal{Z}^m$ , in all compatible graph  $\mathcal{G}^m$ , where  $\mathcal{X}^m(\mathcal{Z}^m) = \mathcal{X}^m \setminus \text{Anc}(\mathcal{Z}^m, \mathcal{G}_{\overline{\mathcal{W}^m}}^m)$ . Since  $\mathcal{X}^m(\mathcal{Z}^m)$  is not,  
 252 in general, a union of clusters, the associated mutilation depends on the particular graph  $\mathcal{G}^m$ . As a  
 253 result, it is not possible to directly apply this mutilation to the unfolded graph to derive an atomically  
 254 complete criterion for Rule 3.

255 Nonetheless, if Rule 3 does not hold in some compatible graph  $\mathcal{G}^m$ , then there exists a structure of  
 256 interest between  $\mathcal{Y}^m$  and  $\mathcal{X}^m$  in  $\mathcal{G}_{u, \overline{\mathcal{W}^m}, \mathcal{X}^m(\mathcal{Z}^m)}^m$ . If this structure includes a root  $X_x \in \mathcal{X}^m$ , then  $X_x$  must  
 257 be an ancestor of some  $Z_z \in \mathcal{Z}^m$  in the mutilated graph. In such a case, we can augment the structure  
 258 of interest by explicitly adding the directed path from  $X_x$  to  $Z_z$ , resulting in a new structure whose  
 259 roots lie outside  $\mathcal{X}^m$ . This constructive process of eliminating roots from  $\mathcal{X}^m$  is behind the third rule  
 260 in Theorem 2.

261 For all the rules, structures of interest are sought in the unfolded graph. The canonical compatible  
 262 graph is then used to ensure that the identified structure of interest actually exists in a compatible  
 263 graph.

264 All the calculus rules given in Theorem 2 are atomically complete, as stated by Theorem 3.

265 **Theorem 3** (Atomic completeness). The calculus in Theorem 2 is atomically complete i.e. if the rule  
 266 does not hold given a C-DAG, then there exists a compatible graph in which the corresponding rule  
 267 in Pearl's calculus fails.

268 **Example 3.** Let us consider  $\mathcal{G}^C$ , the C-DAG depicted in Figure 2c. Figure 2f displays the correspond-  
 269 ing unfolded graph and canonical compatible graphs. The plain and dashed arrows represent  $\mathcal{G}_{can}^m$ ,  
 270 while the dotted arrows denote the "eligible" edges. According to the second rule of Theorem 2, we  
 271 have  $P(\mathbf{y}^m \mid do(\mathbf{z}^m)) = P(\mathbf{y}^m \mid \mathbf{z}^m)$ . Indeed any structure of interest  $\sigma^m$  which connects  $\mathcal{Y}^m$  and  $\mathcal{Z}^m$   
 272 under  $\emptyset$  contains the arrows  $A_1 \rightarrow B_2 \rightarrow Z_1$ . Since  $\mathcal{G}_{can}^m$  contains  $Z_1 \rightarrow A_1$ , we know that  $\mathcal{G}_{can}^m \cup \sigma^m$   
 273 contains a cycle. Therefore,  $\mathcal{G}_{u, \overline{\emptyset, \mathcal{Z}^m}}^m$  does not contain a structure of interest  $\sigma^m$  that connects  $\mathcal{Y}^m$  and  
 274  $\mathcal{Z}^m$  under  $\emptyset$  such that  $\mathcal{G}_{can}^m \cup \sigma^m$  is acyclic.

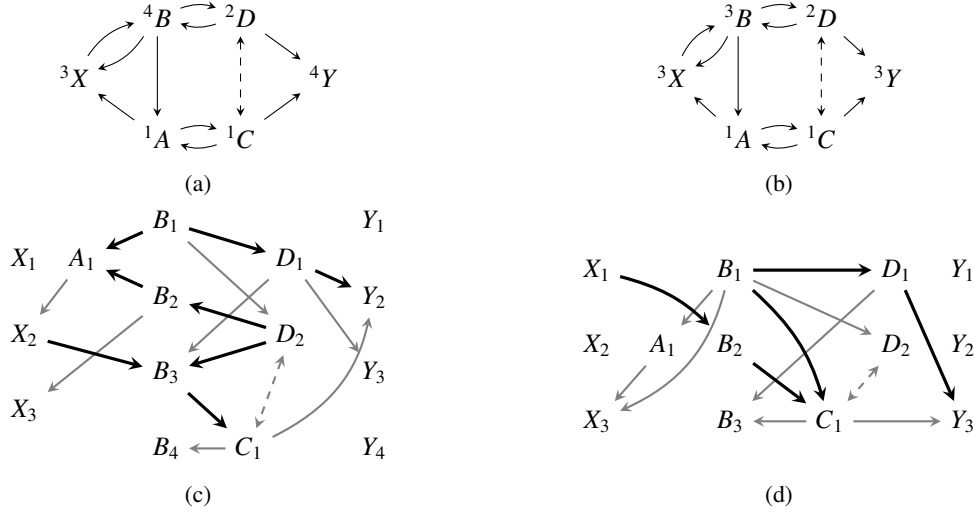

Figure 3: Top:  $\mathcal{G}^C$  (left) and  $\mathcal{G}_{\leq 3}^C$  (right). Bottom: a graph compatible with  $\mathcal{G}^C$  (left) and a graph compatible with  $\mathcal{G}_{\leq 3}^C$  (right). In Figure 3c, the arrows in **bold black** represent a structure of interest that connects  $X^m$  and  $Y^m$  under  $C^m \cup A^m$ . In Figure 3d, the arrows in **bold black** represent the structure of interest that connects  $X_{\leq 3}^m$  and  $Y_{\leq 3}^m$  under  $C_{\leq 3}^m \cup A_{\leq 3}^m$ , which is obtained by applying the strategy used in the proof of Theorem 4.

### 3 Computational efficiency: reducing clusters of large size to 3 nodes

While Theorem 2 provides a sound and atomically complete calculus, its direct application may be impractical for large clusters, as computing  $\mathcal{G}_u^m$  becomes intractable due to a combinatorial explosion in the number of edges. To address this, we associate with any C-DAG  $\mathcal{G}^C$  a simplified C-DAG  $\mathcal{G}_{\leq 3}^C$  on the same set of nodes (but with different cardinals), where each cluster of size greater than 3 is reduced to size 3. The set of edges of  $\mathcal{G}_{\leq 3}^C$  is the set of edges of  $\mathcal{G}^C$ . The key difference is that  $C(\mathcal{G}_{\leq 3}^C) \neq C(\mathcal{G}^C)$ , because the graphs compatible with  $\mathcal{G}_{\leq 3}^C$  contain fewer nodes and different edges than the graphs compatible with  $\mathcal{G}^C$ . We illustrate this in Figure 3. Notably, Theorem 4 shows that applying the calculus on  $\mathcal{G}^C$  or on  $\mathcal{G}_{\leq 3}^C$  leads to the same results.

**Theorem 4** (Infinity is at most three). *Let  $\mathcal{G}^C$  be a C-DAG and  $\mathcal{G}_{\leq 3}^C$  be the corresponding C-DAG where all clusters of size greater than 3 are reduced to size 3. Let  $\mathcal{W}^C, \mathcal{X}^C, \mathcal{Y}^C$  and  $\mathcal{Z}^C$  be pairwise disjoint subsets of nodes. For  $i \in \{1, 2, 3\}$ , let  $R_i(\mathcal{W}, \mathcal{X}, \mathcal{Y}, \mathcal{Z})$  be the  $i^{\text{th}}$  rule of Pearl's Calculus applied to  $(\mathcal{W}, \mathcal{X}, \mathcal{Y}, \mathcal{Z})$ , and say it "does not hold in  $\mathcal{G}$ " whenever its associated  $d$ -separation condition in the associated mutilated graph is not satisfied. The following propositions are equivalent:*

1. *There exists  $\mathcal{G}^m \in C(\mathcal{G}^C)$  in which  $R_i(\mathcal{W}^m, \mathcal{X}^m, \mathcal{Y}^m, \mathcal{Z}^m)$  does not hold.*
2. *There exists  $\mathcal{G}_{\leq 3}^m \in C(\mathcal{G}_{\leq 3}^C)$  in which  $R_i(\mathcal{W}_{\leq 3}^m, \mathcal{X}_{\leq 3}^m, \mathcal{Y}_{\leq 3}^m, \mathcal{Z}_{\leq 3}^m)$  does not hold.*

Where  $\mathcal{W}_{\leq 3}^m, \mathcal{X}_{\leq 3}^m, \mathcal{Y}_{\leq 3}^m$  and  $\mathcal{Z}_{\leq 3}^m$  are the sets of nodes corresponding to  $\mathcal{W}^C, \mathcal{X}^C, \mathcal{Y}^C$  and  $\mathcal{Z}^C$  in  $\mathcal{G}_{\leq 3}^C$ .

Figure 3 illustrates Theorem 4 by showing how a graph  $\mathcal{G}^m \in C(\mathcal{G}^C)$ , in which a given  $d$ -separation does not hold, is transformed into  $\mathcal{G}_{\leq 3}^m \in C(\mathcal{G}_{\leq 3}^C)$ , in which the corresponding  $d$ -separation does not hold as well. The figure highlights how this transformation impacts the structure of interest that violates the  $d$ -separation by omitting all irrelevant dependencies (see Figure 3d).

Theorem 4 shows that reducing cluster size to at most three preserves all relevant dependencies. This bound is tight: in some C-DAGs, any further reduction of the size of the clusters (by removing more nodes) would necessarily lose causal information. Example 4 illustrates such a case.

**Example 4** (Infinity is at least three). *Let  $\mathcal{G}^C$  be the C-DAG defined by Figure 4a. Let  $\mathcal{X}^C = \{X^C\}$ ,  $\mathcal{Y}^C = \{Y^C\}$  and  $\mathcal{Z}^C = \{Z^{1C}, Z^{2C}\}$ . There exists a compatible graph  $\mathcal{G}^m$  in which  $\mathcal{X}^m \not\perp_{\mathcal{G}^m} \mathcal{Y}^m \mid \mathcal{Z}^m$ : we displayed it in Figure 4b.*



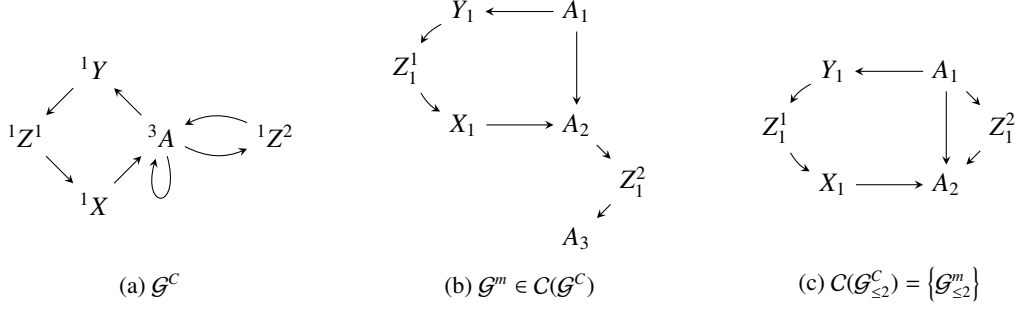

Figure 4: Figure 4a depicts a cluster  $\mathcal{G}^C$ . Figure 4b illustrates a graph compatible with  $\mathcal{G}^C$ . Figure 4c illustrates the unique graph compatible with  $\mathcal{G}_{\leq 2}^C$ .

302 *There is only one graph compatible with  $\mathcal{G}_{\leq 2}^C$  :  $C(\mathcal{G}_{\leq 2}^C) = \{\mathcal{G}_{\leq 2}^m\}$  (the one displayed in Figure 4c).*  
 303 *Moreover, in  $\mathcal{G}_{\leq 2}^m$ , the corresponding dependence does not hold.*

## 304 4 Discussion

305 **On Cluster d-Separation** Theorem 2 provides a sound and atomically complete calculus for causal  
 306 identification. In addition, our results offer a sound and atomically complete solution to the problem  
 307 of cluster d-separation. Specifically, the criterion for cluster d-separation corresponds to the first  
 308 rule of Theorem 2 when taking  $\mathcal{W}^c = \emptyset$ . Furthermore, Theorem 6 in Appendix establishes cluster  
 309 d-separation under cluster-level mutilations. Our results thus encompass both the first (association)  
 310 and second (intervention) rungs of Pearl’s ladder of causation.

311 **Recovering the results on standard (acyclic) C-DAGs** Theorem 2 recovers the results of Anand  
 312 et al. (2023). When a C-DAG  $\mathcal{G}^C$  is acyclic, its corresponding unfolded graph  $\mathcal{G}_u^m$  is also acyclic. As  
 313 a result,  $\mathcal{G}_u^m$  is a compatible graph and standard d-separation is both sound and complete in  $\mathcal{G}_u^m$ .

314 **A 2-step strategy** In our study, the unfolded graph defines the search space for the structures of  
 315 interest, while the canonical compatible graph ensures that these structures can indeed be realized  
 316 within a compatible graph. By keeping these two notions distinct, we are able to apply mutilations  
 317 directly on the unfolded graph without restricting the overall class of compatible graphs. This  
 318 approach resolves the non-commutativity between mutilation and enumeration of compatible graphs,  
 319 since performing mutilation before enumeration generally produces a strictly larger set of graphs  
 320 than enumerating first before mutilating. A similar phenomenon was observed in Zhang (2008) in the  
 321 context of ancestral graphs.

## 322 5 Conclusion

323 We have addressed in this study the problem of identification in causal abstractions based on arbitrary  
 324 clusterings of variables in ADMGs, extending the framework considered in Anand et al. (2023) to  
 325 abstract graphs which potentially contain self-loops and cycles between clusters. This extension is  
 326 important in practice as the structure induced on clusters of variables in a given ADMG is likely  
 327 to contain cycles between clusters. In this framework, we have first reformulated the notion of  
 328 d-separation in an ADMG using structures of interest, a reformulation which remains faithful to the  
 329 original formulation as finding a structure of interest is sufficient to d-connect two sets, and then  
 330 provided a causal calculus which is both sound and atomically complete. We further showed that any  
 331 cluster can be reduced to a cluster of limited size, leading to efficient calculus rules.

332 In the future, we aim to establish the global completeness of the calculus, as it is currently only  
 333 atomically complete. We also plan to extend this work by considering micro-level interventions, *i.e.*,  
 334 interventions on individual variables rather than on clusters of variables, when only the C-DAG is  
 335 known.

## References

- Anand, T. V., Ribeiro, A. H., Tian, J., and Bareinboim, E. (2023). Causal Effect Identification in Cluster DAGs. *Proceedings of the AAAI Conference on Artificial Intelligence*, 37(10):12172–12179.
- Assaad, C. K., Devijver, E., and Gaussier, E. (2022). Discovery of extended summary graphs in time series. In Cussens, J. and Zhang, K., editors, *Proceedings of the Thirty-Eighth Conference on Uncertainty in Artificial Intelligence*, volume 180 of *Proceedings of Machine Learning Research*, pages 96–106. PMLR.
- Beckers, S. and Halpern, J. Y. (2019). Abstracting causal models. In *Proceedings of the Thirty-Third AAAI Conference on Artificial Intelligence and Thirty-First Innovative Applications of Artificial Intelligence Conference and Ninth AAAI Symposium on Educational Advances in Artificial Intelligence*. AAAI Press.
- Chalupka, K., Eberhardt, F., and Perona, P. (2016). Multi-level cause-effect systems. In Gretton, A. and Robert, C. C., editors, *Proceedings of the 19th International Conference on Artificial Intelligence and Statistics*, volume 51 of *Proceedings of Machine Learning Research*, pages 361–369, Cadiz, Spain. PMLR.
- Chalupka, K., Perona, P., and Eberhardt, F. (2015). Visual causal feature learning. In *Proceedings of the Thirty-First Conference on Uncertainty in Artificial Intelligence*, page 181–190, Arlington, Virginia, USA. AUAI Press.
- Ferreira, S. and Assaad, C. K. (2024). Identifiability of direct effects from summary causal graphs. *Proceedings of the AAAI Conference on Artificial Intelligence*, 38(18):20387–20394.
- Ferreira, S. and Assaad, C. K. (2025). Identifying macro conditional independencies and macro total effects in summary causal graphs with latent confounding. *Proceedings of the AAAI Conference on Artificial Intelligence*, 39(25):26787–26795.
- Jaber, A., Ribeiro, A., Zhang, J., and Bareinboim, E. (2022). Causal identification under markov equivalence: Calculus, algorithm, and completeness. In Koyejo, S., Mohamed, S., Agarwal, A., Belgrave, D., Cho, K., and Oh, A., editors, *Advances in Neural Information Processing Systems*, volume 35, pages 3679–3690. Curran Associates, Inc.
- Pearl, J. (2009). *Causality*. Cambridge University Press, Cambridge, 2 edition.
- Perković, E., Textor, J., Kalisch, M., and Maathuis, M. H. (2018). Complete Graphical Characterization and Construction of Adjustment Sets in Markov Equivalence Classes of Ancestral Graphs. *Journal of Machine Learning Research*, 18:1–62.
- Rubenstein, P. K., Weichwald, S., Bongers, S., Mooij, J. M., Janzing, D., Grosse-Wentrup, M., and Schölkopf, B. (2017). Causal consistency of structural equation models. In *Proceedings of the 33rd Conference on Uncertainty in Artificial Intelligence (UAI)*, page ID 11.
- Schölkopf, B., Locatello, F., Bauer, S., Ke, N. R., Kalchbrenner, N., Goyal, A., and Bengio, Y. (2021). Toward causal representation learning. *Proceedings of the IEEE*, 109(5):612–634.
- Wahl, J., Ninad, U., and Runge, J. (2023). Vector causal inference between two groups of variables. *Proceedings of the AAAI Conference on Artificial Intelligence*, 37(10):12305–12312.
- Wahl, J., Ninad, U., and Runge, J. (2024). Foundations of causal discovery on groups of variables. *Journal of Causal Inference*, 12(1).
- Zhang, J. (2008). Causal Reasoning with Ancestral Graphs. *Journal of Machine Learning Research*, 9:1437–1474.

|     |                                                                                       |           |
|-----|---------------------------------------------------------------------------------------|-----------|
| 379 | <b>Contents</b>                                                                       |           |
| 380 | <b>1 Preliminaries</b>                                                                | <b>3</b>  |
| 381 | <b>2 A Causal Calculus for Cyclic C-DAGs</b>                                          | <b>4</b>  |
| 382 | 2.1 Structure of interest . . . . .                                                   | 4         |
| 383 | 2.2 Associated graphs . . . . .                                                       | 5         |
| 384 | 2.3 Calculus . . . . .                                                                | 6         |
| 385 | <b>3 Computational efficiency: reducing clusters of large size to 3 nodes</b>         | <b>8</b>  |
| 386 | <b>4 Discussion</b>                                                                   | <b>9</b>  |
| 387 | <b>5 Conclusion</b>                                                                   | <b>9</b>  |
| 388 | <b>A Technical Appendices and Supplementary Material</b>                              | <b>12</b> |
| 389 | A.1 Basic Properties of C-DAGs . . . . .                                              | 12        |
| 390 | A.2 Proof of Theorem 1 . . . . .                                                      | 13        |
| 391 | A.3 Proofs of the Properties of the canonical compatible Graph and the Unfolded Graph | 16        |
| 392 | A.3.1 Canonical Compatible Graph . . . . .                                            | 16        |
| 393 | A.3.2 Unfolded Graph . . . . .                                                        | 17        |
| 394 | A.3.3 Proof of Proposition 3 . . . . .                                                | 18        |
| 395 | A.4 Proofs of the Calculus . . . . .                                                  | 18        |
| 396 | A.4.1 Cluster D-separation with Cluster Mutilations . . . . .                         | 18        |
| 397 | A.4.2 Proofs of the Three Rules of the Calculus . . . . .                             | 19        |
| 398 | A.5 Proof of Theorem 4 . . . . .                                                      | 21        |

## 399 A Technical Appendices and Supplementary Material

400 **Notation 1.** Let  $\mathcal{G}^C$  be a C-DAG, and let  $V$  be a cluster in  $\mathcal{G}^C$ . When  $V$  is seen as a node of  $\mathcal{G}^C$ ,  $V$   
 401 will be written as  $V^C$ ; but when  $V$  is seen as a set of variables of a graph  $\mathcal{G}^m$  on micro-variables,  $V$   
 402 will be written as  $V^m = \{V_1, \dots, V_{\#V}\}$  where the indices follow the topological ordering induced by  
 403  $\mathcal{G}^m$ . We will use the same notations for any intersection or union of cluster.

404 **Terminology on paths.** Let  $\pi$  be a path and  $X$  a subset of variables. We say that  $\pi$  intersects or  
 405 encounters  $X$  if they share at least one common vertex. We treat paths as ordered lists of variables,  
 406 which allows us to define the first and last encounter of  $\pi$  with  $X$ . The first encounter is the first vertex  
 407 in the order of  $\pi$  that also belongs to  $X$ . Similarly, the last encounter is the last such vertex in the  
 408 order of  $\pi$ . Let  $\pi$  be a path from  $X$  to  $Y$ . Let  $A$  be a vertex on  $\pi$ . We denote by  $\pi_{[X,A]}$  the subpath of  $\pi$   
 409 from its first vertex to  $A$  and  $\pi_{[A,Y]}$  from  $A$  to its last vertex.

### 410 A.1 Basic Properties of C-DAGs

411 In this section, following the notations of Perković et al. (2018), an arrow ( $\leftrightarrow$ ) represents either a  
 412 directed arrow ( $\leftarrow$ ) or a dashed-bidirected arrows ( $\leftrightarrow$ ).

413 **Proposition 4.** Let  $\mathcal{V}^C$  be a partition of  $\mathcal{V}^m$ . Let  $\mathcal{G}^C$  be a mixed graph over  $\mathcal{V}^C$  and let  $C(\mathcal{G}^C)$   
 414 denote the class of graphs compatible with  $\mathcal{G}^C$ . Then the following propositions are equivalent:

- 415 •  $C(\mathcal{G}^C) \neq \emptyset$
- 416 •  $\mathcal{G}^C$  does not contain any cycle on clusters of size 1.

417 *Proof.* Let us prove the two implications:

- 418 •  $\Rightarrow$ : If  $\mathcal{G}^C$  contains the cycle  $^1A \rightarrow \dots \rightarrow ^1A$ , then any compatible graph would contain the  
 419 cycle  $A_1 \rightarrow \dots \rightarrow A_1$ , which is not allowed because compatible graphs have to be acyclic.
- 420 •  $\Leftarrow$ : If  $\mathcal{G}^C$  does not contain any cycle on cluster of size 1. Let us construct a compatible  
 421 graph. For all cluster  $V$  of size 1, we put all incoming and outgoing edges at  $V_1$ . This does  
 422 not create a cycle because, otherwise,  $\mathcal{G}^C$  would contain a cycle on cluster of size 1. For  
 423 all other clusters  $V$ , as they are at least of size 2, we can deal with  $V_1$  and  $V_2$ . We put all  
 424 outgoing edges at  $V_1$  and all incoming edges at  $V_2$ . This construction cannot introduce a  
 425 directed cycle, since no vertex in  $V^m$  ever has both an incoming and an outgoing edge.

426 □

427 **Proposition 5.** Let  $\mathcal{G}^C$  be a C-DAG,  $\mathcal{G}^m$  be a compatible graph with  $\mathcal{G}^C$  and  $V^C$  and  $W^C$  be nodes of  
 428  $\mathcal{G}^C$ . If  $\mathcal{G}^m$  contains two similar (same type) arrows between  $V^m$  and  $W^m$ , then removing one of these  
 429 arrows create another compatible graph.

430 *Proof.* By definition, only one arrow between  $V^m$  and  $W^m$  is necessary. □

431 **Proposition 6.** Let  $\mathcal{G}^C$  be a C-DAG,  $\mathcal{G}^m$  be a compatible graph with  $\mathcal{G}^C$  and  $V^C$  be a node in  $\mathcal{G}^C$ , i.e.  
 432 a cluster. If there exists  $(i, j)$  with  $i > j$  such that  $\mathcal{G}^m$  contains the arrow  $V_i \rightarrow W_w$ , then there exists a  
 433 compatible graph  $\mathcal{G}^{m'}$  that contains the arrow  $V_j \rightarrow W_w$  and not  $V_i \rightarrow W_w$  if desired.

434 *Proof.* If  $i > j$ , thus by the convention of Notation 1, we know that  $V_j$  is before  $V_i$  in the topological  
 435 order of  $\mathcal{G}^m$ . Thus,  $V_j$  is not a descendant of  $V_i$  in  $\mathcal{G}^m$ . Thus,  $V_j$  is not a descendant of  $W_w$  in  $\mathcal{G}^m$ .  
 436 Therefore, adding the arrow  $V_j \rightarrow W_w$  into  $\mathcal{G}^m$  does not create a cycle, because otherwise  $V_j$  would  
 437 be a descendant of  $W_w$  in  $\mathcal{G}^m$ .

438 By Proposition 5,  $V_i \rightarrow W_w$  can be thereafter removed if desired. □

439 **Corollary 1.** Let  $\mathcal{G}^C$  be a C-DAG,  $\mathcal{G}^m$  be a compatible graph and  $V^C$  be a cluster. If  $\mathcal{G}^m$  contains a  
 440 path which contains a fork on  $V_i$  with  $i > j$ , then there exists a compatible graph  $\mathcal{G}^{m'}$  which contains  
 441 the same path except that the fork is on  $V_j$ .

442 *Proof.* Apply Proposition 6 twice. □

443 **Proposition 7.** *Let  $\mathcal{G}^C$  be a C-DAG,  $\mathcal{G}^m$  be a compatible graph and  $V^C$  be a cluster. If there exists*  
 444  *$i < j$  such that  $\mathcal{G}^m$  contains the arrow  $V_i \leftarrow \bullet W_w$ , where  $\leftarrow \bullet$ , then there exists a compatible graph  $\mathcal{G}^{m'}$*   
 445 *that contains the arrow  $V_j \leftarrow \bullet W_w$  and not  $V_i \leftarrow \bullet W_w$  if desired.*

446 *Proof.*  $i < j$ , thus by the convention of Notation 1, we know that  $W_w$  is not a descendant of  $V_j$ .  
 447 Therefore, adding the arrow  $V_j \leftarrow \bullet W_w$  does not create a cycle.

448 By Proposition 5,  $V_i \leftarrow \bullet W_w$  can be removed if desired. □

## 449 A.2 Proof of Theorem 1

450 We introduce Figure 5 which helps the reader understanding structures of interest.

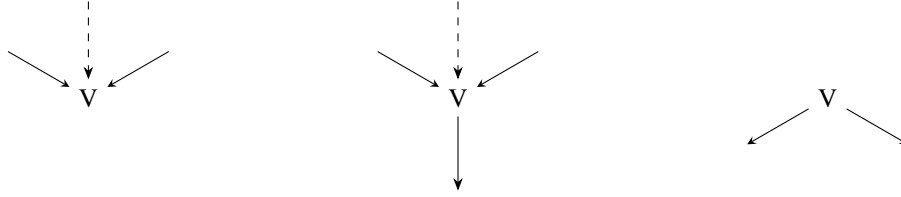

Figure 5: We represent the three forms that arrows can take around a vertex with multiple arrow in a structure of interest. Some vertices have incoming arrows (left), some have incoming arrows and a single outgoing arrow (middle), and some have exactly two outgoing arrows and no incoming arrows (right).

451 During the proofs, we are often led to construct structures of interest in which a root lies outside the  
 452 target set. However, the graph containing such a structure also includes a directed path from this  
 453 problematic root (outside the target set) to a vertex within the target set. Lemma 1 shows how to  
 454 exploit this directed path to construct a new structure of interest where the problematic root has been  
 455 removed. Figure 6 depicts this idea.

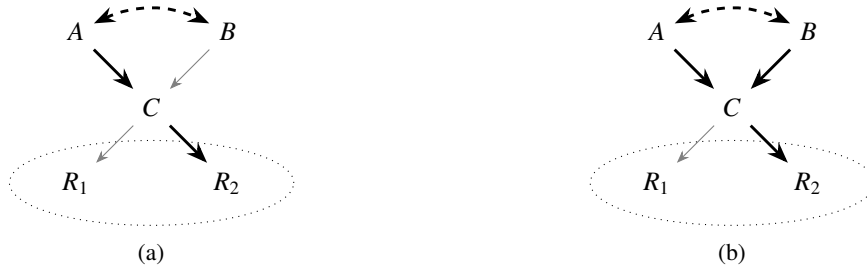

Figure 6: Figure 6a depicts a graph containing a structure of interest shown in bold black. Let us assume that the target set of roots is  $\{R_1, R_2\}$ . In this graph,  $B$  is a root outside the target set. However, the graph contains a directed path  $\langle B, C, R_1 \rangle$  from  $B$  to a vertex in the target set. Figure 6b illustrates how this path can be used to construct a structure of interest in which  $B$  is no longer a root, without introducing a new root outside the target set.

456 **Lemma 1** (Add a Path to Remove a Problematic Root). *Let  $\mathcal{G}$  be an ADMG. Let  $X$ ,  $\mathcal{Y}$  and  $\mathcal{Z}$  be*  
 457 *pairwise distinct subsets of nodes of  $\mathcal{G}$ . Let  $\sigma$  be a structure of interest such that:*

- 458 •  $\sigma \subseteq \mathcal{G}$
- 459 •  $X \cap \sigma \neq \emptyset$  and  $\mathcal{Y} \cap \sigma \neq \emptyset$ .
- 460 •  $(\sigma \setminus \text{Root}(\sigma)) \cap \mathcal{Z} = \emptyset$ .

461 *If there exists  $R \in (\text{Root}(\sigma) \setminus \mathcal{Z}) \cap \text{Anc}(\mathcal{Z}, \mathcal{G})$  then  $\mathcal{G}$  contains a structure of interest  $\sigma'$  such that:*

- 462 (a)  $\sigma' \subseteq \mathcal{G}$   
 463 (b)  $X \cap \sigma' \neq \emptyset$  and  $\mathcal{Y} \cap \sigma' \neq \emptyset$ .  
 464 (c)  $(\sigma' \setminus \text{Root}(\sigma')) \cap \mathcal{Z} = \emptyset$ .  
 465 (d)  $\text{Root}(\sigma') \setminus \mathcal{Z} \subseteq (\text{Root}(\sigma) \setminus \mathcal{Z}) \setminus \{R\}$ .

466 *Sketch of proof.*  $R \in \text{Anc}(\mathcal{Z}, \mathcal{G})$ , thus  $\mathcal{G}$  contains a directed path  $\pi$  from  $R$  to  $\mathcal{Z}$ . We add this path  
 467 to  $\sigma$  to remove  $R$  from the root set. The end of the path is in  $\mathcal{Z}$ , thus we do not add a problematic  
 468 root.  $\square$

469 *Proof.*  $R \in \text{Anc}(\mathcal{Z}, \mathcal{G})$ , thus  $\mathcal{G}$  contains a directed path  $\pi$  from  $R$  to  $\mathcal{Z}$ . Without loss of generality, we  
 470 assume that  $\pi$  meets  $\mathcal{Z}$  only at its last vertex. We construct  $\sigma'$  with the following procedure:

- 471 • If  $\sigma \cap \pi \setminus \{R\} = \emptyset$ , then  $\sigma \cup \pi$  is a structure of interest. In this case, we set  $\sigma' \leftarrow \sigma \cup \pi$ . We  
 472 have the following properties:
- 473 (a)  $\sigma' \subseteq \mathcal{G}$  because  $\sigma \subseteq \mathcal{G}$  and  $\pi \subseteq \mathcal{G}$ .  
 474 (b)  $X \cap \sigma \subseteq X \cap \sigma'$  and  $\mathcal{Y} \cap \sigma \subseteq \mathcal{Y} \cap \sigma'$  thus  $X \cap \sigma' \neq \emptyset$  and  $\mathcal{Y} \cap \sigma' \neq \emptyset$ .  
 475 (c) By construction,  $\text{Root}(\sigma') = \text{Root}(\sigma) \cup \text{Root}(\pi) \setminus \{R\}$ . Thus,  $\sigma' \setminus \text{Root}(\sigma') = \{R\} \cup$   
 476  $(\sigma \cup \pi) \setminus (\text{Root}(\sigma) \cup \text{Root}(\pi)) \subseteq \{R\} \cup (\sigma \setminus \text{Root}(\sigma)) \cup (\pi \setminus \text{Root}(\pi))$ . Since  $R \notin \mathcal{Z}$ ,  
 477  $(\sigma \setminus \text{Root}(\sigma)) \cap \mathcal{Z} = \emptyset$ , and  $(\pi \setminus \text{Root}(\pi)) \cap \mathcal{Z} = \emptyset$  (because  $\pi$  meets  $\mathcal{Z}$  only at its last  
 478 vertex), we can conclude that  $(\sigma' \setminus \text{Root}(\sigma')) \cap \mathcal{Z} = \emptyset$ .  
 479 (d)  $\text{Root}(\sigma') = \text{Root}(\sigma) \cup \text{Root}(\pi) \setminus \{R\}$ . Since  $\text{Root}(\pi) \subseteq \mathcal{Z}$ , we conclude that  $\text{Root}(\sigma') \setminus$   
 480  $\mathcal{Z} \subseteq (\text{Root}(\sigma) \setminus \mathcal{Z}) \setminus \{R\}$ .
- 481 • Otherwise,  $\sigma \cap \pi \setminus \{R\} \neq \emptyset$ . Let  $W$  be the first encounter of  $\pi$  and  $\sigma \setminus \{R\}$  and let  $\pi'$  be the  
 482 subpath of  $\pi$  from  $R$  to  $W$ .<sup>4</sup> In this case, we set  $\sigma' \leftarrow \sigma \cup \pi'$ . We have (a), (b), but also
- 483 (c) By construction,  $\text{Root}(\sigma') = \text{Root}(\sigma) \setminus \{R\}$ . Thus,  $\sigma' \setminus \text{Root}(\sigma') = \{R\} \cup (\sigma \setminus \text{Root}(\sigma)) \cup$   
 484  $(\pi' \setminus \text{Root}(\sigma))$ . Since  $\pi$  meets  $\mathcal{Z}$  only at its last vertex, we know that  $\pi' \cap \mathcal{Z} \subseteq \{W\}$ .<sup>5</sup>  
 485 Thus,  $(\pi' \setminus \text{Root}(\sigma)) \cap \mathcal{Z} = (\pi' \cap \mathcal{Z}) \setminus \text{Root}(\sigma) \subseteq \{W\} \setminus \text{Root}(\sigma) \subseteq \sigma \setminus \text{Root}(\sigma)$ . Since  
 486  $R \notin \mathcal{Z}$  and  $(\sigma \setminus \text{Root}(\sigma)) \cap \mathcal{Z} = \emptyset$ , we can conclude that  $(\sigma' \setminus \text{Root}(\sigma')) \cap \mathcal{Z} = \emptyset$ .  
 487 (d)  $\text{Root}(\sigma') = \text{Root}(\sigma) \setminus \{R\}$ . Therefore,  $\text{Root}(\sigma') \setminus \mathcal{Z} \subseteq (\text{Root}(\sigma) \setminus \mathcal{Z}) \setminus \{R\}$ .

488 However,  $\sigma'$  is not necessarily a structure of interest. By construction,  $W$  is the only node  
 489 of  $\sigma \cup \pi'$  which does not necessarily satisfy the conditions of Definition 3. Since  $\sigma$  is a  
 490 structure of interest, the arrows around  $W$  in  $\sigma$  are necessarily in one of the three cases  
 491 described by Figure 5. The right hand case is the only case where adding an incoming arrow  
 492 prevents  $\sigma'$  from being a structure of interest. Thus, if  $\sigma'$  is not a structure of interest, it  
 493 means that  $W$  has one incoming arrow and two outgoing arrows in  $\sigma'$ . Let  $A$  and  $B$  be the  
 494 two children of  $W$  in  $\sigma'$ . Moreover, since  $\sigma \cap \pi \neq \emptyset$ , we know that  $\sigma'$  has a single connected  
 495 component. Let  $\pi^*$  be a path between  $X \in \mathcal{X}$  and  $Y \in \mathcal{Y}$  in  $\sigma'$ . Let us show that we can  
 496 assume that  $\pi^*$  does not use  $A \leftarrow W \rightarrow B$ :

- 497 – If  $\pi^*$  uses  $A \leftarrow W \rightarrow B$ . Without loss of generality, we assume that  $A$  is before  $B$  in  
 498  $\pi^*$ . Let  $\pi^{XR}$  be a path from  $X$  to  $R$  in  $\sigma$ . We distinguish two cases:
- 499 \* If  $\pi^{XR}$  does not encounter  $W$  (cf Figure 7a). We consider  $\theta := \pi^{XR} \cup \pi' \cup \pi_{[W,Y]}^*$ .  $\theta$   
 500 is a subgraph of  $\sigma'$  in which  $X$  and  $\mathcal{Y}$  are connected.<sup>6</sup> By construction,  $\theta$  does not  
 501 contain  $A \leftarrow W$ . Thus  $\theta \subseteq \sigma'$  contains a path between  $X$  and  $\mathcal{Y}$  that does not use  
 502  $A \leftarrow W \rightarrow B$ .  
 503 \* Otherwise,  $\pi^{XR}$  encounters  $W$ . Since  $\pi^{XR} \subseteq \sigma$ ,  $\pi^{XR}$  uses  $A \leftarrow W \rightarrow B$ . We  
 504 distinguish two cases:  
 505 · If  $A$  is before  $B$  in  $\pi^{XR}$  (cf Figure 7b), we consider  $\theta := \pi_{[X,W]}^* \cup \pi' \cup \pi_{[R,B]}^{XR} \cup \pi_{[B,Y]}^*$ .  
 506  $\theta$  is a subgraph of  $\sigma'$  in which  $X$  and  $\mathcal{Y}$  are connected. By construction,  $\theta$  does

<sup>4</sup> $\pi$  and  $\pi'$  may be equal.

<sup>5</sup> $\pi' \cap \mathcal{Z}$  is empty if  $\pi' \neq \pi$ , otherwise, it is equal to  $\{W\}$ .

<sup>6</sup> $\theta$  is not necessarily a path.

not contain  $W \rightarrow B$ . Thus  $\theta \subseteq \sigma'$  contains a path between  $X$  and  $Y$  that does not use  $A \leftarrow W \rightarrow B$ .  
 Otherwise,  $A$  is after  $B$  in  $\pi^{XR}$  (cf Figure 7c), we consider  $\theta := \pi_{[X,B]}^{XR} \cup \pi_{[B,Y]}^*$ .  $\theta$  is a subgraph of  $\sigma'$  in which  $X$  and  $Y$  are connected. By construction,  $\theta$  does not contain  $A \leftarrow W \rightarrow B$ . Thus  $\theta \subseteq \sigma'$  contains a path between  $X$  and  $Y$  that does not use  $A \leftarrow W \rightarrow B$ .

Thus, without loss of generality, we assume that  $\pi^*$  does not use  $A \leftarrow W \rightarrow B$ . We remove from  $\sigma'$  one outgoing arrow from  $W$  that is not used by  $\pi^*$ . By doing so,  $W$  satisfies the conditions of Definition 3. Thus, all the vertices in  $\sigma'$  now satisfy the conditions of Definition 3, and satisfies (a) and (b), and

- (c)  $(\sigma' \setminus \text{Root}(\sigma')) \cap \mathcal{Z} = \emptyset$  because removing the arrow does not change the vertices nor the roots of  $\sigma'$ .
- (d)  $\text{Root}(\sigma') \setminus \mathcal{Z} \subseteq (\text{Root}(\sigma) \setminus \mathcal{Z}) \setminus \{R\}$  because removing the arrow does not change the roots of  $\sigma'$ .

However,  $\sigma'$  does not contain necessarily a single connected component. Thus, we only keep the connected component of  $X$ , which contains  $Y$  via  $\pi^*$ . By doing so,  $\sigma'$  is now a structure of interest and we have:

- (c)  $(\sigma' \setminus \text{Root}(\sigma')) \cap \mathcal{Z} = \emptyset$  because we consider a subgraph.
- (d)  $\text{Root}(\sigma') \setminus \mathcal{Z} \subseteq (\text{Root}(\sigma) \setminus \mathcal{Z}) \setminus \{R\}$  because we consider a subgraph.

□

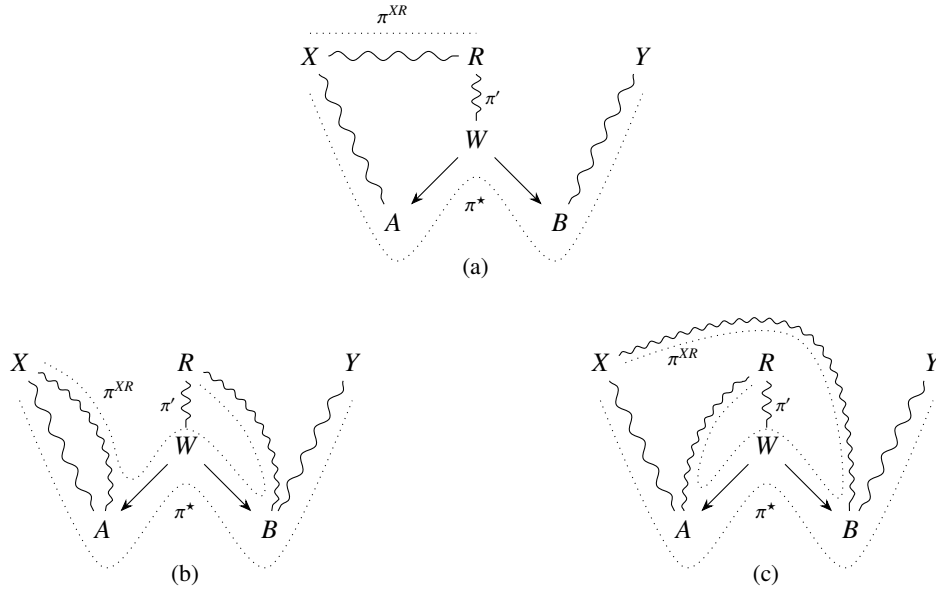

Figure 7: Helping figure for the Proof of Lemma 1.  $\pi^*$  and  $\pi^{XR}$  are represented by the dotted paths following the arrows. A squiggly arrow represents an arbitrary path.

**Corollary 2.** Let  $\mathcal{G}$  be an ADMG. Let  $X$ ,  $Y$ ,  $\mathcal{Z}$  and  $\mathcal{R}$  be pairwise distinct subsets of nodes of  $\mathcal{G}$ . Let  $\mathcal{G}$  contains a structure of interest  $\sigma$  such that:

- $X \cap \sigma \neq \emptyset$  and  $Y \cap \sigma \neq \emptyset$
- $\text{Root}(\sigma) \subseteq \mathcal{Z} \cup X \cup Y \cup \mathcal{R}$
- $(\sigma \setminus \text{Root}(\sigma)) \cap \mathcal{Z} = \emptyset$

If for all  $R \in \mathcal{R}$ ,  $R \in \text{Anc}(\mathcal{Z}, \mathcal{G})$ , then  $\mathcal{G}$  contains a structure of interest that connects  $X$  and  $Y$  under  $\mathcal{Z}$ .

534 *Proof.* We apply Lemma 1 iteratively for each  $R \in \mathcal{R}$ , we get a structure of interest  $\sigma'$  such that:

- 535 •  $\sigma' \subseteq \mathcal{G}$
- 536 •  $X \cap \sigma' \neq \emptyset$  and  $\mathcal{Y} \cap \sigma' \neq \emptyset$
- 537 •  $\text{Root}(\sigma') \setminus \mathcal{Z} \subseteq (\text{Root}(\sigma) \setminus \mathcal{Z}) \setminus \mathcal{R}$ . Thus,  $\text{Root}(\sigma) \subseteq \mathcal{Z} \cup X \cup \mathcal{Y}$ .
- 538 •  $(\sigma' \setminus \text{Root}(\sigma')) \cap \mathcal{Z} = \emptyset$

539 Therefore,  $\sigma'$  a structure of interest that connects  $X$  and  $\mathcal{Y}$  under  $\mathcal{Z}$ . □

540 **Theorem 1** (D-connection with structures of interests). *Let  $\mathcal{G}$  be an ADMG. Let  $X, \mathcal{Y}, \mathcal{Z}$  be pairwise*  
 541 *disjoint subsets of nodes of  $\mathcal{G}$ . The following properties are equivalent:*

- 542 1.  $X \not\perp_{\mathcal{G}} \mathcal{Y} \mid \mathcal{Z}$ .
- 543 2.  $\mathcal{G}$  contains a structure of interest  $\sigma$  such that  $X \not\perp_{\sigma} \mathcal{Y} \mid \mathcal{Z}$ .

544 *Proof.* Let us prove the two implications:

- 545 •  $1 \Rightarrow 2$ : If  $X \not\perp_{\mathcal{G}} \mathcal{Y} \mid \mathcal{Z}$ , then, by definition, the ADMG  $\mathcal{G}$  contains a path  $\pi$  d-connecting  $X$   
 546 and  $\mathcal{Y}$ . Without loss of generality, we assume that  $\pi$  encounters  $X$  only at its first vertex and  
 547  $\mathcal{Y}$  only at its last vertex. Since  $\pi$  is a d-connecting path, it is a structure of interest which  
 548 satisfies the following properties:

- 549 –  $\pi \subseteq \mathcal{G}$ .
- 550 –  $X \cap \pi \neq \emptyset$  and  $\mathcal{Y} \cap \pi \neq \emptyset$ .
- 551 –  $(\pi \setminus \text{Root}(\pi)) \cap \mathcal{Z} = \emptyset$ .

552 However, some roots of  $\pi$  may not be in  $\mathcal{Z} \cup X \cup \mathcal{Y}$ , preventing  $\pi$  from being a  
 553 connecting structure of interest. Necessarily, these roots are colliders. Define  $\mathcal{R} :=$   
 554  $\text{Root}(\pi) \setminus (\mathcal{Z} \cup X \cup \mathcal{Y})$  to be the set of these colliders. Since  $\pi$  is d-connecting, for all  $R \in \mathcal{R}$ ,  
 555  $R \in \text{Anc}(\mathcal{Z}, \mathcal{G})$ . By Corollary 2,  $\mathcal{G}$  contains a structure of interest which connects  $X$  and  $\mathcal{Y}$   
 556 under  $\mathcal{Z}$ .

- 557 •  $2 \Rightarrow 1$ : By definition,  $\sigma$  has a single connected component. Thus  $\sigma$  contains a path  $\pi$  from  
 558  $X$  to  $\mathcal{Y}$ . Without loss of generality, we assume that  $\pi$  encounters  $X$  only at its first vertex  
 559 and  $\mathcal{Y}$  only at its last vertex. Let us first prove that without loss of generality, we can assume  
 560 that all colliders on  $\pi$  are ancestors of  $\mathcal{Z}$ . If it's not the case, since  $\text{Root}(\sigma) \subseteq \mathcal{Z} \cup X \cup \mathcal{Y}$ ,  
 561 all colliders that are not ancestors of  $\mathcal{Z}$  are ancestors of  $X \cup \mathcal{Y}$ . Without loss of generality,  
 562 assume that a collider  $C$  on  $\pi$  is an ancestor of  $X$ . Thus,  $\sigma$  contains a directed path  $\pi^1$  from  
 563  $C$  to  $X$ . Let  $\pi^2$  be the subpath of  $\pi$  between  $C$  and  $\mathcal{Y}$ . Since  $C$  belongs to both  $\pi^1$  and  $\pi^2$ ,  
 564 these two paths intersect at  $C$ , and possibly at other vertices. Let  $T$  be the last vertex of  $\pi^1$   
 565 that is in  $\pi^1 \cap \pi^2$ . Let  $\pi' := \pi_{[T, X]}^1 \cup \pi_{[T, \mathcal{Y}]}^2$ .  $\pi'$  is a path. Moreover, between  $X$  and  $T$ ,  $\pi'$   
 566 is a directed path, and, after  $T$  to  $\mathcal{Y}$ ,  $\pi'$  is a subpath of  $\pi^2$ . Therefore,  $\pi'$  contains at least  
 567 one fewer collider than  $\pi$  that is not an ancestor of  $\mathcal{Z}$ . Repeating this procedure iteratively  
 568 allows us to construct a path in  $\sigma$  from  $X$  to  $\mathcal{Y}$  in which all colliders are ancestors of  $\mathcal{Z}$ .

569 Finally, note that all forks and chains on  $\pi$  are not roots by definition, and hence do not  
 570 belong to  $\mathcal{Z}$ . Therefore, the resulting path  $\pi$  is d-connecting between  $X$  and  $\mathcal{Y}$  given  $\mathcal{Z}$ .

571 □

### 572 A.3 Proofs of the Properties of the canonical compatible Graph and the Unfolded Graph

#### 573 A.3.1 Canonical Compatible Graph

574 **Proposition 1.** *Let  $\mathcal{G}^C$  be a C-DAG and  $\mathcal{G}_{can}^m$  be its corresponding canonical compatible graph. Then,*  
 575 *the following properties hold:*

- 576 1.  $\mathcal{G}_{can}^m \in C(\mathcal{G}^C)$ .



577 2. For all  $\mathcal{G}^m \in C(\mathcal{G}^C)$ ,  $\mathcal{G}_{can}^m \cup \mathcal{G}^m \in C(\mathcal{G}^C)$ .

578 We break the proof of Proposition 1 in Lemma 2 and Lemma 3.

579 **Lemma 2.** Let  $\mathcal{G}^C$  be a C-DAG. Then,  $\mathcal{G}_{can}^m$ , its canonical compatible graph, is compatible with  $\mathcal{G}^C$ .

580 *Proof.* By construction, all arrows in  $\mathcal{G}^C$  are represented in  $\mathcal{G}_{can}^m$ . Moreover, all arrows that are added  
 581 correspond to an arrow in  $\mathcal{G}^C$ . Therefore, we only need to check for acyclicity to prove that  $\mathcal{G}_{can}^m$  is a  
 582 compatible graph with  $\mathcal{G}^C$ . By contradiction, let us assume that  $\mathcal{G}_{can}^m$  contains a cycle  $\pi$ . First, we  
 583 know that  $\pi$  is not within a single cluster. Indeed, in each cluster  $V$ ,  $\mathcal{G}_{can|V}^m$  is a  $V_{\#V}$ -rooted tree. Thus,  
 584  $\pi$  encounters at least two clusters and has an arrow between two clusters. Let  $A_1 \rightarrow B_{\#B}$  be such an  
 585 arrow. We prove that necessarily,  $\#A^C = 1$ . Indeed, if  $\#A^C \geq 2$ , then no arrow in  $\mathcal{G}_{can}^m$  is pointing  
 586 on  $A_1$ . Similarly, we can show that  $\#B^C = 1$ . Thus, the next arrow cannot be pointing into  $B^C$ , thus  
 587 the next arrow is also an arrow between two clusters. By induction, we show that all the clusters  
 588 encountered by  $\pi$  have a cardinal of 1. This contradicts Proposition 4. Therefore,  $\mathcal{G}_{can}^m$  is acyclic.

589 Therefore,  $\mathcal{G}_{can}^m$  is a compatible graph with  $\mathcal{G}^C$ .  $\square$

590 **Lemma 3.** Let  $\mathcal{G}^C$  be a C-DAG,  $\mathcal{G}_{can}^m$  be its corresponding canonical compatible graph, and  $\mathcal{G}^m$  be a  
 591 compatible graph. Then,  $\mathcal{G}_{can}^m \cup \mathcal{G}^m$  is a compatible graph.

592 *Proof.* Since  $\mathcal{G}^m$  and  $\mathcal{G}_{can}^m$  are compatible, then we only need to check for acyclicity. Let label indices  
 593 according to Notation 1. Let  $a$  be an arrow in  $\mathcal{G}_{can}^m$  that is not in  $\mathcal{G}^m$ . We distinguish three cases:

- 594 • If  $a$  is a dashed-bidirected arrow, then adding  $a$  does not create a cycle.
- 595 • If  $a$  is a directed arrow inside a cluster  $V^C$ , since  $\mathcal{G}^m$  follows Notation 1, then the indices  
 596 in  $V^m$  follow the topological ordering induced by  $\mathcal{G}^m$ . Therefore,  $a$  can be added without  
 597 creating a cycle.
- 598 • Otherwise,  $a$  corresponds to an arrow between two clusters  $V^m$  and  $U^m$ .  $\mathcal{G}^m$  is compatible  
 599 thus it also contains an arrow from  $U^m$  to  $V^m$ . By applying Propositions 6 and 7, we see that  
 600 we can add  $a$  without creating a cycle.

601 Therefore,  $\mathcal{G}_{can}^m \cup \mathcal{G}^m$  is a compatible graph.  $\square$

### 602 A.3.2 Unfolded Graph

603 **Proposition 2.** Let  $\mathcal{G}^C$  be a C-DAG and  $\mathcal{G}_u^m$  be its corresponding unfolded graph. Then, any  
 604 compatible graph  $\mathcal{G}^m$  is a subgraph of  $\mathcal{G}_u^m$  up to a permutation of indices in each cluster.

605 *Proof.* Let  $\mathcal{G}^m = (\mathcal{V}^m, \mathcal{E}^m)$  be a compatible graph. By definition, we already know that  $\mathcal{V}^m = \mathcal{V}_u$ .  
 606  $\mathcal{G}^m$  is a DAG, thus, in each cluster, we can permute the indices of the vertices so that the topological  
 607 order of  $\mathcal{G}^m$  agrees with the order of the indices. Let  $a$  be an arrow of  $\mathcal{G}^m$ . We distinguish three cases:

- 608 • If  $a$  is a dashed-bidirected-arrow, then  $a$  is also in  $\mathcal{G}_u^m$  because  $\mathcal{G}_u^m$  is a super graph of  $\mathcal{G}_{can}^m$   
 609 which contains all possible dashed-bidirected-arrows.
- 610 • If  $a$  corresponds to a self-loop  $\subset V^C$  in  $\mathcal{G}^C$ . Necessarily, in  $\mathcal{G}^m$ ,  $a = V_i \rightarrow V_j$  with  $i < j$ .  
 611 Thus,  $a$  corresponds to an arrow added during step 2 of Definition 5. Therefore,  $a$  is also an  
 612 arrow in  $\mathcal{G}_u^m$ .
- 613 • Otherwise,  $a$  corresponds to an arrow  $U^C \rightarrow V^C$ , with  $U^C \neq V^C$ . We distinguish two cases:  
 614 – If  $a$  is added at step 3 of Definition 5, then  $a$  is also an arrow in  $\mathcal{G}_u^m$ .  
 615 – Otherwise, by Lemma 3, we know that  $\mathcal{G}_{can}^m \cup \mathcal{G}^m$  is compatible. Thus  $\mathcal{G}_{can}^m \cup \mathcal{G}^m$  is  
 616 acyclic. Since  $\mathcal{G}_{can}^m \cup a$  is a subgraph of  $\mathcal{G}_{can}^m \cup \mathcal{G}^m$ , we can conclude that  $a$  does not  
 617 create a cycle in  $\mathcal{G}_{can}^m$ . Thus,  $a \in \mathcal{E}_{eligible}$ . Therefore  $a$  is an arrow in  $\mathcal{G}_u^m$ .

618 Hence,  $\mathcal{E}^m \subseteq \mathcal{E}_u$ . Therefore,  $\mathcal{G}^m$  is a subgraph of  $\mathcal{G}_u$ .

619  $\square$

### 620 A.3.3 Proof of Proposition 3

621 **Proposition 3.** *Let  $\mathcal{G}^C$  be a C-DAG and  $\mathcal{G}_u^m$  be its corresponding unfolded graph. Let  $\sigma^m$  be a*  
 622 *structure of interest in  $\mathcal{G}_u^m$ . If  $\mathcal{G}_{can}^m \cup \sigma^m$  is acyclic, then  $\mathcal{G}_{can}^m \cup \sigma^m$  is compatible with  $\mathcal{G}^C$ .*

623 *Proof.* By Proposition 1,  $\mathcal{G}_{can}^m$  is compatible with  $\mathcal{G}^C$ . Therefore,  $\mathcal{G}_{can}^m \cup \sigma^m$  contains all necessary  
 624 arrows to be compatible with  $\mathcal{G}^C$ . Moreover, by definition of  $\mathcal{G}_u^m$ , all arrow  $V_v \rightarrow W_w$  in  $\sigma^m \subseteq \mathcal{G}_u^m$   
 625 correspond to an arrow  $V \rightarrow W$  in  $\mathcal{G}^C$ . Therefore,  $\mathcal{G}_{can}^m \cup \sigma^m$  does not contain any arrow preventing it  
 626 from being compatible with  $\mathcal{G}_u^m$ .  $\mathcal{G}_{can}^m \cup \sigma^m$  is acyclic, thus it is an ADMG. Therefore,  $\mathcal{G}_{can}^m \cup \sigma^m$  is  
 627 compatible with  $\mathcal{G}^C$ .  $\square$

### 628 A.4 Proofs of the Calculus

629 First of all let us recall the rules of Pearl's calculus for cluster queries.

630 **Theorem 5** (Do-Calculus Rules for Cluster Queries (Pearl, 2009)). *Let  $\mathcal{G}^C$  be a C-DAG and*  
 631  *$\mathcal{X}^C, \mathcal{Y}^C, \mathcal{Z}^C, \mathcal{W}^C$  be pairwise distinct subsets of nodes. Let  $\mathcal{G}^m$  be a compatible graph. The following*  
 632 *rules hold:*

633 1. *Insertion/deletion of observations:*

$$634 P(\mathbf{y}^m \mid do(\mathbf{w}^m), \mathbf{x}^m, \mathbf{z}^m) = P(\mathbf{y}^m \mid do(\mathbf{w}^m), \mathbf{z}^m) \quad \text{if } \mathcal{Y}^m \perp\!\!\!\perp_{\mathcal{G}_{\overline{\mathcal{W}^m}}^m} \mathcal{X}^m \mid \mathcal{W}^m, \mathcal{Z}^m$$

635 2. *Action/observation exchange:*

$$636 P(\mathbf{y}^m \mid do(\mathbf{w}^m), do(\mathbf{x}^m), \mathbf{z}^m) = P(\mathbf{y}^m \mid do(\mathbf{w}^m), \mathbf{x}^m, \mathbf{z}^m) \quad \text{if } \mathcal{Y}^m \perp\!\!\!\perp_{\mathcal{G}_{\overline{\mathcal{W}^m}, \mathcal{X}^m}^m} \mathcal{X}^m \mid \mathcal{W}^m, \mathcal{Z}^m$$

637 3. *Insertion/deletion of actions:*

$$638 P(\mathbf{y}^m \mid do(\mathbf{w}^m), do(\mathbf{x}^m), \mathbf{z}^m) = P(\mathbf{y}^m \mid do(\mathbf{w}^m), \mathbf{z}^m) \quad \text{if } \mathcal{Y}^m \perp\!\!\!\perp_{\mathcal{G}_{\overline{\mathcal{W}^m}, \mathcal{X}^m}^m(\mathcal{Z}^m)} \mathcal{X}^m \mid \mathcal{W}^m, \mathcal{Z}^m$$

$$639 \text{ where } \mathcal{X}^m(\mathcal{Z}^m) := \mathcal{X}^m \setminus \text{Anc}(\mathcal{Z}^m, \mathcal{G}_{\overline{\mathcal{W}^m}}^m).$$

640 The first two rules hinge on graphical conditions expressed as d-separations under cluster-level  
 641 mutilations. We begin by rigorously characterizing this form of dependency; Theorem 6 provides  
 642 precisely this characterization.

#### 643 A.4.1 Cluster D-separation with Cluster Mutilations

644 **Theorem 6.** *Let  $\mathcal{G}^C = (\mathcal{V}^C, \mathcal{E}^C)$  be a C-DAG. Let  $\mathcal{G}_{can}^m$  be its corresponding canonical compatible*  
 645 *graph. Let  $\mathcal{G}_u^m$  be the corresponding unfolded graph. Let  $\mathcal{X}^C, \mathcal{Y}^C$  and  $\mathcal{Z}^C$  be pairwise distinct subsets*  
 646 *of nodes of  $\mathcal{G}^C$ . Let  $\mathcal{A}$  and  $\mathcal{B}$  be subsets of nodes of  $\mathcal{G}^C$ . Then the following properties are equivalent:*

$$647 1. \exists \mathcal{G}^m \in \mathcal{C}(\mathcal{G}^C) \quad \mathcal{X}^m \not\perp\!\!\!\perp_{\mathcal{G}_{\overline{\mathcal{A}^m}, \mathcal{B}^m}}^m \mathcal{Y}^m \mid \mathcal{Z}^m.$$

$$648 2. \mathcal{G}_{\overline{\mathcal{A}^m}, \mathcal{B}^m}}^m \text{ contains a structure of interest } \sigma^m \text{ such that } \mathcal{X}^m \not\perp\!\!\!\perp_{\sigma^m} \mathcal{Y}^m \mid \mathcal{Z}^m \text{ and } \mathcal{G}_{can}^m \cup \sigma^m \text{ is}$$

$$649 \text{ acyclic.}$$

650 *Proof.* Let us prove the two implications:

- 651 •  $1 \Rightarrow 2$ : Let  $\mathcal{G}^m$  be a compatible graph such that  $\mathcal{G}_{\overline{\mathcal{A}^m}, \mathcal{B}^m}}^m$  contains a structure of interest  $\sigma^m$   
 652 which connects  $\mathcal{X}^m$  and  $\mathcal{Y}^m$  under  $\mathcal{Z}^m$ . By Lemma 2,  $\sigma^m \subseteq \mathcal{G}_{\overline{\mathcal{A}^m}, \mathcal{B}^m}}^m \subseteq \mathcal{G}^m \subseteq \mathcal{G}_u^m$ . Moreover,  
 653 since  $\sigma^m \subseteq \mathcal{G}_{\overline{\mathcal{A}^m}, \mathcal{B}^m}}^m$ , we know that  $\sigma^m$  does not contain any incoming arrow in  $\mathcal{A}^m$  and no  
 654 outgoing arrow from  $\mathcal{B}^m$ . Therefore,  $\sigma^m \subseteq \mathcal{G}_{\overline{\mathcal{A}^m}, \mathcal{B}^m}}^m$  and  $\sigma^m$  connects  $\mathcal{X}^m$  and  $\mathcal{Y}^m$  under  $\mathcal{Z}^m$ .

655 By Lemma 3,  $\mathcal{G}_{can}^m \cup \mathcal{G}^m$  is a compatible graph, thus acyclic. Moreover,  $\mathcal{G}_{can}^m \cup \sigma^m \subseteq \mathcal{G}_{can}^m \cup \mathcal{G}^m$ .  
 656 Therefore,  $\mathcal{G}_{can}^m \cup \sigma^m$  is acyclic.

- 657 •  $2 \Rightarrow 1$ :  $\mathcal{G}_{can}^m \cup \sigma^m$  is acyclic. By Lemma 2,  $\mathcal{G}_{can}^m$  is compatible. Moreover, all arrows from  
 658  $\sigma^m$  come from  $\mathcal{G}_u^m$ . Therefore,  $\mathcal{G}_{can}^m \cup \sigma^m$  is a compatible graph.

Moreover, since  $\sigma^m \subseteq \mathcal{G}_{\mathcal{A}^m \mathcal{B}^m}^m$ , we know that  $\sigma^m$  does not contain any incoming arrow in  $\mathcal{A}^m$  and no outgoing arrow from  $\mathcal{B}^m$ . Thus,  $\sigma^m \subseteq (\mathcal{G}_{\text{can}}^m \cup \sigma^m)_{\mathcal{A}^m \mathcal{B}^m}$ . Since  $\sigma^m$  connects  $\mathcal{X}^m$  and  $\mathcal{Y}^m$  under  $\mathcal{Z}^m$ , we can conclude that  $\mathcal{X}^m \not\perp_{(\mathcal{G}_{\text{can}}^m \cup \sigma^m)_{\mathcal{A}^m \mathcal{B}^m}} \mathcal{Y}^C \mid \mathcal{Z}^m$ .

□

Figure 8 illustrates Theorem 6.

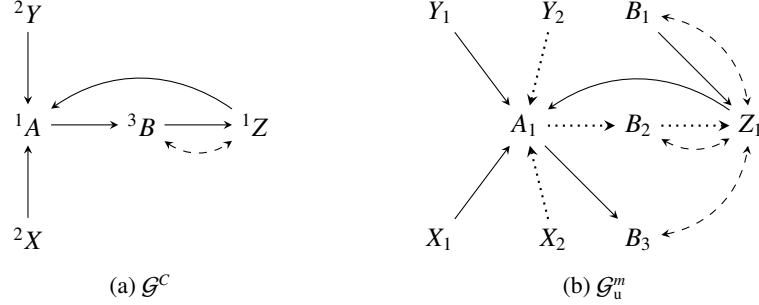

Figure 8: (a) a C-DAG  $\mathcal{G}^C$ . (b) its corresponding unfolded graphs. The plain and dashed arrows represent  $\mathcal{G}_{\text{can}}^m$ , while the dotted arrows denote the "eligible" edges. According to Theorem 6, we have  $\forall \mathcal{G}^m \in \mathcal{C}(\mathcal{G}^C) \mathcal{X}^m \perp_{\mathcal{G}^m} \mathcal{Y}^m \mid \mathcal{Z}^m$ , as all structures of interest connecting  $\mathcal{X}^m$  and  $\mathcal{Y}^m$  given  $\mathcal{Z}^m$  in  $\mathcal{G}_{\text{u}}^m$  include a directed path from  $A_1$  to  $Z_1$ . Since  $\mathcal{G}_{\text{can}}^m$  already contains the edge  $Z_1 \rightarrow A_1$ , such paths would necessarily form a cycle.

#### A.4.2 Proofs of the Three Rules of the Calculus

As soon as Theorem 6 has been established, Rules 1 and 2 of the calculus follow almost immediately. In contrast, the third rule of Pearl's do-calculus requires verifying the d-separation condition  $\mathcal{Y}^m \perp_{\mathcal{G}_{\mathcal{W}^m, \mathcal{X}^m(\mathcal{Z}^m)}^m} \mathcal{X}^m \mid \mathcal{W}^m, \mathcal{Z}^m$ , in all compatible graph  $\mathcal{G}^m$ , where  $\mathcal{X}^m(\mathcal{Z}^m) = \mathcal{X}^m \setminus \text{Anc}(\mathcal{Z}^m, \mathcal{G}_{\mathcal{W}^m}^m)$ . Since  $\mathcal{X}^m(\mathcal{Z}^m)$  is not, in general, a union of clusters, the associated mutilation depends on the particular graph  $\mathcal{G}^m$ . As a result, this rule does not fall under the scope of Theorem 6.

Nonetheless, if Rule 3 does not hold in some compatible graph  $\mathcal{G}^m$ , then there exists a structure of interest between  $\mathcal{Y}^m$  and  $\mathcal{X}^m$  in  $\mathcal{G}_{\mathcal{W}^m, \mathcal{X}^m(\mathcal{Z}^m)}^m$ . If this structure includes a root  $X_x \in \mathcal{X}^m$ , then  $X_x$  must be an ancestor of some  $Z_z \in \mathcal{Z}^m$  in the mutilated graph. In such a case, we can augment the structure of interest by explicitly adding the directed path from  $X_x$  to  $\mathcal{Z}^m$ , resulting in a new structure whose roots lie outside  $\mathcal{X}^m$ .

**Theorem 2** (Calculus). *Let  $\mathcal{G}^C$  be a C-DAG and let  $\mathcal{G}_{\text{u}}^m$  be its corresponding unfolded graph. Let  $\mathcal{X}^C, \mathcal{Y}^C, \mathcal{Z}^C, \mathcal{W}^C$  be pairwise distinct subsets of nodes. Then for any density  $P$  compatible with any compatible graph, the following rules apply:*

- R1.  $P(\mathbf{y}^m \mid \text{do}(\mathbf{w}^m), \mathbf{x}^m, \mathbf{z}^m) = P(\mathbf{y}^m \mid \text{do}(\mathbf{w}^m), \mathbf{z}^m)$  if  $\mathcal{G}_{\mathcal{u} \mathcal{W}^m}^m$  does not contain a structure of interest  $\sigma^m$  such that  $\mathcal{X}^m \not\perp_{\sigma^m} \mathcal{Y}^m \mid \mathcal{W}^m, \mathcal{Z}^m$  and  $\mathcal{G}_{\text{can}}^m \cup \sigma^m$  is acyclic.
- R2.  $P(\mathbf{y}^m \mid \text{do}(\mathbf{w}^m), \text{do}(\mathbf{x}^m), \mathbf{z}^m) = P(\mathbf{y}^m \mid \text{do}(\mathbf{w}^m), \mathbf{x}^m, \mathbf{z}^m)$  if  $\mathcal{G}_{\mathcal{u} \mathcal{W}^m, \mathcal{X}^m}^m$  does not contain a structure of interest  $\sigma^m$  such that  $\mathcal{X}^m \not\perp_{\sigma^m} \mathcal{Y}^m \mid \mathcal{W}^m, \mathcal{Z}^m$  and  $\mathcal{G}_{\text{can}}^m \cup \sigma^m$  is acyclic.
- R3.  $P(\mathbf{y}^m \mid \text{do}(\mathbf{w}^m), \text{do}(\mathbf{x}^m), \mathbf{z}^m) = P(\mathbf{y}^m \mid \text{do}(\mathbf{w}^m), \mathbf{z}^m)$  if  $\mathcal{G}_{\mathcal{u} \mathcal{W}^m}^m$  does not contain a structure of interest  $\sigma^m$  such that  $\mathcal{X}^m \not\perp_{\sigma^m} \mathcal{Y}^m \mid \mathcal{W}^m, \mathcal{Z}^m$ ,  $\mathcal{G}_{\text{can}}^m \cup \sigma^m$  is acyclic and  $\text{Root}(\sigma^m) \subseteq (\mathcal{W}^m \cup \mathcal{Z}^m) \cup \mathcal{Y}^m$ .

*Proof.* The first two rules are proven by Theorem 6. The third one is proved by the following reasoning.

We will show that if the third rule applies, then in all compatible graph  $\mathcal{G}^m$ , the third rule of Pearl's calculus applies. More precisely, we prove the contrapositive. Let  $\mathcal{G}^m$  be a compatible graph in which the third rule does not apply. Then,  $\mathcal{G}_{\mathcal{W}^m, \mathcal{X}^m(\mathcal{Z}^m)}^m$  contains a structure of interest  $\sigma^m$  that connects  $\mathcal{Y}^m$

and  $\lambda^m$  under the conditioning set  $\mathcal{W}^m \cup \mathcal{Z}^m$ , where  $\lambda^m(\mathcal{Z}^m) = X^m \setminus \text{Anc}(\mathcal{Z}^m, \mathcal{G}_{\overline{\mathcal{W}^m}}^m)$ . By definition, we already know that  $\sigma^m$  follows the following properties:

- $\sigma^m \subseteq \mathcal{G}_{\overline{\mathcal{W}^m}, \lambda^m(\mathcal{Z}^m)}^m \subseteq \mathcal{G}_{\overline{\mathcal{W}^m}}^m$ .
- $\lambda^m \cap \sigma^m \neq \emptyset$  and  $\mathcal{Y}^m \cap \sigma^m \neq \emptyset$ .
- $\text{Root}(\sigma^m) \subseteq (\mathcal{W}^m \cup \mathcal{Z}^m) \cup \mathcal{Y}^m \cup \lambda^m$
- $(\sigma^m \setminus \text{Root}(\sigma^m)) \cap (\mathcal{W}^m \cup \mathcal{Z}^m) = \emptyset$

Let us remark that  $\text{Root}(\sigma^m) \cap \lambda^m \subseteq \lambda^m \setminus \lambda^m(\mathcal{Z}^m) = \text{Anc}(\mathcal{Z}^m, \mathcal{G}_{\overline{\mathcal{W}^m}}^m)$ . Indeed, let  $X_x$  be an element of  $\text{Root}(\sigma^m) \cap \lambda^m$ . Since  $X_x$  is a root and  $\sigma^m$  has a single connected component,  $X_x$  must have an incoming edge within  $\sigma^m$ . Thus,  $X_x$  must have an incoming edge within  $\mathcal{G}_{\overline{\mathcal{W}^m}, \lambda^m(\mathcal{Z}^m)}^m$ . Thus  $X_x \notin \lambda^m(\mathcal{Z}^m)$ . For element of  $\text{Root}(\sigma^m) \cap \lambda^m$ , we iteratively update  $\sigma^m$  using Lemma 1. At the end of this process, we obtain a structure of interest  $\sigma^{m'}$  which satisfies the following identities:

- $\sigma^{m'} \subseteq \mathcal{G}_{\overline{\mathcal{W}^m}}^m$ .
- $\lambda^m \cap \sigma^{m'} \neq \emptyset$  and  $\mathcal{Y}^m \cap \sigma^{m'} \neq \emptyset$ .
- $(\sigma^{m'} \setminus \text{Root}(\sigma^{m'})) \cap (\mathcal{W}^m \cup \mathcal{Z}^m) = \emptyset$
- $\text{Root}(\sigma^{m'}) \setminus (\mathcal{W}^m \cup \mathcal{Z}^m) \subseteq (\text{Root}(\sigma^m) \setminus (\mathcal{W}^m \cup \mathcal{Z}^m)) \setminus (\text{Root}(\sigma^m) \cap \lambda^m) \subseteq \mathcal{Y}^m$

Thus,  $\text{Root}(\sigma^{m'}) \subseteq (\mathcal{W}^m \cup \mathcal{Z}^m) \cup \mathcal{Y}^m$  and  $\sigma^{m'}$  is a structure of interest which connects  $\lambda^m$  and  $\mathcal{Y}^m$  under  $\mathcal{W}^m \cup \mathcal{Z}^m$ . Since  $\mathcal{G}_{\overline{\mathcal{W}^m}}^m \subseteq \mathcal{G}_{\overline{\mathcal{W}^m}}^m$ , it follows that  $\mathcal{G}_{\overline{\mathcal{W}^m}}^m$  contains  $\sigma^{m'}$ . Moreover, since  $\mathcal{G}_{\text{can}}^m \cup \sigma^{m'} \subseteq \mathcal{G}_{\text{can}}^m \cup \mathcal{G}_{\overline{\mathcal{W}^m}}^m$ , it follows that  $\mathcal{G}_{\text{can}}^m \cup \sigma^{m'}$  is acyclic.

Therefore,  $\mathcal{G}_{\overline{\mathcal{W}^m}}^m$  contains a structure of interest  $\sigma^m$  which  $\lambda^m$  and  $\mathcal{Y}^m$  under  $\mathcal{W}^m \cup \mathcal{Z}^m$ , with  $\text{Root}(\sigma^m) \subseteq (\mathcal{W}^m \cup \mathcal{Z}^m) \cup \mathcal{Y}^m$ , and such that  $\mathcal{G}_{\text{can}}^m \cup \sigma^m$  is acyclic.  $\square$

**Theorem 3** (Atomic completeness). *The calculus in Theorem 2 is atomically complete i.e. if the rule does not hold given a C-DAG, then there exists a compatible graph in which the corresponding rule in Pearl's calculus fails.*

*Proof.* The first two rules are proven by Theorem 6. The third one is proved by the following reasoning.

If the rule does not hold, then  $\mathcal{G}_{\overline{\mathcal{W}^m}}^m$  contains a structure of interest  $\sigma^m$  that connects  $\lambda^m$  and  $\mathcal{Y}^m$  under  $\mathcal{W}^m \cup \mathcal{Z}^m$  such that  $\text{Root}(\sigma^m) \subseteq (\mathcal{W}^m \cup \mathcal{Z}^m) \cup \mathcal{Y}^m$  and  $\mathcal{G}_{\text{can}}^m \cup \sigma^m$  is acyclic.  $\mathcal{G}_{\text{can}}^m \cup \sigma^m$  is acyclic, thus  $\mathcal{G}^m := \mathcal{G}_{\text{can}}^m \cup \sigma^m$  is a compatible graph. Moreover, since  $\sigma^m \subseteq \mathcal{G}_{\overline{\mathcal{W}^m}}^m$ , then  $\sigma^m \subseteq \mathcal{G}_{\overline{\mathcal{W}^m}}^m$ . We will show that we can assume that  $\sigma^m \subseteq \mathcal{G}_{\overline{\mathcal{W}^m}, \lambda^m(\mathcal{Z}^m)}^m$ , where  $\lambda^m(\mathcal{Z}^m) = X^m \setminus \text{Anc}(\mathcal{Z}^m, \mathcal{G}_{\overline{\mathcal{W}^m}}^m)$ :

By definition,  $\lambda^m \cap \sigma^m \neq \emptyset$ . Let  $X_x$  be an element of  $\lambda^m \cap \sigma^m$ . We distinguish the cases:

- If  $\sigma^m$  contains an outgoing arrow from  $X_x$  i.e.  $X_x \rightarrow \subseteq \sigma^m$ . Then this arrow is not deleted by the mutilation  $\overline{\lambda^m(\mathcal{Z}^m)}$ . It exists in  $\mathcal{G}_{\overline{\mathcal{W}^m}, \lambda^m(\mathcal{Z}^m)}^m$ .
- If  $\sigma^m$  contains an incoming arrow to  $X_x$  i.e.  $\rightarrow X_x \subseteq \sigma^m$ . Since  $\text{Root}(\sigma^m) \subseteq (\mathcal{W}^m \cup \mathcal{Z}^m) \cup \mathcal{Y}^m$ , we know that  $X_x$  is not a root. Let  $R_r$  be a root corresponding to  $X_x$  i.e. an element of  $\text{Desc}(X_x, \sigma^m) \cap \text{Root}(\sigma^m)$ . Since  $\sigma^m \subseteq \mathcal{G}_{\overline{\mathcal{W}^m}}^m$ , we know that  $R_r \notin \mathcal{W}^m$ . Thus,  $R_r \in \mathcal{Z}^m \cup \mathcal{Y}^m$ . We distinguish two cases:
  - If  $R_r \in \mathcal{Z}^m$ . Then  $X_x \notin \lambda^m(\mathcal{Z}^m)$ . Therefore,  $\rightarrow X_x$  is not deleted by the mutilation  $\overline{\lambda^m(\mathcal{Z}^m)}$  and it exists in  $\mathcal{G}_{\overline{\mathcal{W}^m}, \lambda^m(\mathcal{Z}^m)}^m$ .
  - Otherwise,  $R_r \in \mathcal{Y}^m$ . Thus,  $\sigma^m$  contains a proper causal path from  $\lambda^m$  to  $\mathcal{Y}^m$ . We update  $\sigma^m$  to be this path. Now  $\sigma^m$  has no incoming arrows on  $\lambda^m$ , thus it exists in  $\mathcal{G}_{\overline{\mathcal{W}^m}, \lambda^m(\mathcal{Z}^m)}^m$ .

Therefore, we can assume that  $\sigma^m \subseteq \mathcal{G}_{\overline{\mathcal{W}^m}, \lambda^m(\mathcal{Z}^m)}^m$ . Therefore, by Theorem 1,  $\mathcal{Y}^m \not\perp_{\mathcal{G}_{\overline{\mathcal{W}^m}, \lambda^m(\mathcal{Z}^m)}^m} X^m \mid \mathcal{W}^m, \mathcal{Z}^m$ , i.e. the third rule of Pearl's do-calculus does not hold in  $\mathcal{G}^m$ .  $\square$

### 733 A.5 Proof of Theorem 4

734 Theorem 4 presents three equivalences, one for each rule of do-calculus. To streamline the proofs, we  
 735 introduce Corollary 3, which restates Theorem 2 in a form better suited to treating all three rules in a  
 736 uniform manner.

737 **Corollary 3.** *Let  $\mathcal{G}^C$  be a C-DAG. Let  $\mathcal{W}^C, \mathcal{X}^C, \mathcal{Y}^C$  and  $\mathcal{Z}^C$  be pairwise disjoint subsets of nodes.  
 738 Let  $\mathcal{W}^m, \mathcal{X}^m, \mathcal{Y}^m$  and  $\mathcal{Z}^m$  be pairwise disjoint subsets of nodes. For  $i \in \{1, 2, 3\}$ , let  $R_i(\mathcal{W}, \mathcal{X}, \mathcal{Y}, \mathcal{Z})$   
 739 be the  $i^{\text{th}}$  rule of Pearl's Calculus applied to  $(\mathcal{W}, \mathcal{X}, \mathcal{Y}, \mathcal{Z})$ , and say it "does not hold in  $\mathcal{G}$ " whenever  
 740 its associated d-separation condition in the associated mutilated graph is not satisfied. The following  
 741 propositions are equivalent:*

- 742 • *There exists  $\mathcal{G}^m \in C(\mathcal{G}^C)$  in which  $R_i(\mathcal{W}^m, \mathcal{X}^m, \mathcal{Y}^m, \mathcal{Z}^m)$  does not hold.*
- 743 •  *$\mathcal{G}_{u(\mathcal{W}^m, \mathcal{M}_i^m)}^m$  contains a structure of interest  $\sigma^m$  such that  $\mathcal{X}^m \not\perp_{\sigma^m} \mathcal{Y}^m \mid \mathcal{W}^m, \mathcal{Z}^m$  and  $\mathcal{G}_{can}^m \cup \sigma^m$   
 744 is acyclic and  $\text{Root}(\sigma^m) \subseteq \mathcal{R}_i^m$ .*

745 where  $\mathcal{M}_i^m = \begin{cases} \mathcal{X}^m & \text{if } i = 2, \\ \emptyset & \text{otherwise.} \end{cases}$  and  $\mathcal{R}_i^m = \begin{cases} (\mathcal{W}^m \cup \mathcal{Z}^m) \cup \mathcal{Y}^m & \text{if } i = 3, \\ (\mathcal{W}^m \cup \mathcal{Z}^m) \cup \mathcal{X}^m \cup \mathcal{Y}^m & \text{otherwise.} \end{cases}$

746 *Proof.* Directly follows from Theorem 2. □

747 In order to prove Theorem 4, we need to prove Lemma 4 on structures of interest.

748 **Lemma 4.** *Let  $\mathcal{G} = (\mathcal{V}, \mathcal{E})$  be a mixed graph. Let  $\mathcal{X}, \mathcal{Y}, \mathcal{Z}$  be pairwise disjoint subsets of  $\mathcal{V}$ . Let  
 749  $\sigma \subseteq \mathcal{G}$  be a structure of interest such that  $\mathcal{X} \not\perp_{\sigma} \mathcal{Y} \mid \mathcal{Z}$ . Then there exists a structure of interest  $\sigma' \subseteq \sigma$   
 750 such that  $\mathcal{X} \not\perp_{\sigma'} \mathcal{Y} \mid \mathcal{Z}$  and such that  $\#\sigma' \cap \mathcal{X} = 1$  and  $\#\sigma' \cap \mathcal{Y} = 1$ .*

751 *Proof.*  $\mathcal{X} \not\perp_{\sigma} \mathcal{Y} \mid \mathcal{Z}$ , thus  $\sigma$  contains a d-connecting path  $\pi$  from  $\mathcal{X}$  to  $\mathcal{Y}$ . For all collider  $C$  on  
 752  $\pi$ ,  $\sigma$  contains a directed path  $\pi_C$  from  $C$  to  $\mathcal{Z}$ . We can assume, without loss of generality, that  
 753 for all collider  $C$ ,  $\pi_C$  does not encounter  $\mathcal{X}$ . Indeed, let  $C^*$  denote the last collider on  $\pi$  such that  
 754  $\pi_{C^*}$  encounters  $\mathcal{X}$ . Let  $X$  be the first encounter of  $\mathcal{X}$  and  $\pi_{C^*}$ . We just need to consider the path  
 755  $\pi' := \pi_{C^*} \cup \pi_{[C^*, X]}$ . Similarly, we can assume, without loss of generality that for all collider  
 756  $C$ ,  $\pi_C$  does not encounter  $\mathcal{Y}$ . We apply the construction of Lemma 1. By doing so, we obtain a  
 757 structure of interest  $\sigma' \subseteq \pi \cup \bigcup_{C \text{ collider on } \pi} \pi_C \subseteq \sigma$  such that  $\mathcal{X} \not\perp_{\sigma'} \mathcal{Y} \mid \mathcal{Z}$ . Therefore,  $\#\sigma' \cap \mathcal{X} = 1$   
 758 and  $\#\sigma' \cap \mathcal{Y} = 1$ . □

759 **Theorem 4** (Infinity is at most three). *Let  $\mathcal{G}^C$  be a C-DAG and  $\mathcal{G}_{\leq 3}^C$  be the corresponding C-DAG  
 760 where all clusters of size greater than 3 are reduced to size 3. Let  $\mathcal{W}^C, \mathcal{X}^C, \mathcal{Y}^C$  and  $\mathcal{Z}^C$  be pairwise  
 761 disjoint subsets of nodes. For  $i \in \{1, 2, 3\}$ , let  $R_i(\mathcal{W}, \mathcal{X}, \mathcal{Y}, \mathcal{Z})$  be the  $i^{\text{th}}$  rule of Pearl's Calculus  
 762 applied to  $(\mathcal{W}, \mathcal{X}, \mathcal{Y}, \mathcal{Z})$ , and say it "does not hold in  $\mathcal{G}$ " whenever its associated d-separation  
 763 condition in the associated mutilated graph is not satisfied. The following propositions are equivalent:*

- 764 1. *There exists  $\mathcal{G}^m \in C(\mathcal{G}^C)$  in which  $R_i(\mathcal{W}^m, \mathcal{X}^m, \mathcal{Y}^m, \mathcal{Z}^m)$  does not hold.*
- 765 2. *There exists  $\mathcal{G}_{\leq 3}^m \in C(\mathcal{G}_{\leq 3}^C)$  in which  $R_i(\mathcal{W}_{\leq 3}^m, \mathcal{X}_{\leq 3}^m, \mathcal{Y}_{\leq 3}^m, \mathcal{Z}_{\leq 3}^m)$  does not hold.*

766 Where  $\mathcal{W}_{\leq 3}^m, \mathcal{X}_{\leq 3}^m, \mathcal{Y}_{\leq 3}^m$  and  $\mathcal{Z}_{\leq 3}^m$  are the sets of nodes corresponding to  $\mathcal{W}^C, \mathcal{X}^C, \mathcal{Y}^C$  and  $\mathcal{Z}^C$  in  $\mathcal{G}_{\leq 3}^C$

767 *Proof.* We prove the two implications.

768 **Proof of 2  $\Rightarrow$  1:**

769 We add as many vertices without arrow as necessary to construct a graph compatible with  $\mathcal{G}^C$  in  
 770 which  $R_i(\mathcal{W}^m, \mathcal{X}^m, \mathcal{Y}^m, \mathcal{Z}^m)$  does not hold.

771 **Proof of 1  $\Rightarrow$  2:** (Figure 9 illustrates the key steps of this implication with a concrete example.)

By Corollary 3,  $\mathcal{G}_{\mathcal{W}^m, \mathcal{M}_i^m}^m$  contains a structure of interest  $\sigma^m$  such that  $\mathcal{X}^m \not\perp_{\sigma^m} \mathcal{Y}^m \mid \mathcal{W}^m, \mathcal{Z}^m$  and  $\mathcal{G}_{\text{can}}^m \cup \sigma^m$  is acyclic and  $\text{Root}(\sigma^m) \subseteq \mathcal{R}_i^m$  where  $\mathcal{M}_i^m = \begin{cases} \mathcal{X}^m & \text{if } i = 2, \\ \emptyset & \text{otherwise.} \end{cases}$  and  $\mathcal{R}_i^m = \begin{cases} (\mathcal{W}^m \cup \mathcal{Z}^m) \cup \mathcal{Y}^m & \text{if } i = 3, \\ (\mathcal{W}^m \cup \mathcal{Z}^m) \cup \mathcal{X}^m \cup \mathcal{Y}^m & \text{otherwise.} \end{cases}$

Let  $\sigma^m$  be such a structure of interest. By Lemma 4, we can assume that  $\#\sigma^m \cap \mathcal{X}^m = 1$  and  $\#\sigma^m \cap \mathcal{Y}^m = 1$ . Let  $V^C$  be a cluster. We split  $\sigma^m \cap V^m$  in two subsets as follows:

$$\mathcal{F} := \{V_v \in \sigma^m \cap V^m \mid V_v \text{ has no incoming arrows in } \sigma^m\}$$

$$\mathcal{NF} := \sigma^m \cap V^m \setminus \mathcal{F}$$

**We will show that we can assume that  $\#\mathcal{NF} \leq 1$  without loss of generality.** Consider the case where  $\#\mathcal{NF} \geq 2$ . Necessarily, since  $\#\sigma^m \cap \mathcal{X}^m = 1$  and  $\#\sigma^m \cap \mathcal{Y}^m = 1$ , we know that  $V^C$  is different from any cluster in  $\mathcal{X}^C \cup \mathcal{Y}^C$ . Let  $V_{\max \mathcal{NF}}$  denote the element of  $\mathcal{NF}$  with maximal index. We distinguish two cases:

- If  $\mathcal{NF}$  contains a root of  $\sigma^m$ . Since  $\mathcal{X}^m \not\perp_{\sigma^m} \mathcal{Y}^m \mid \mathcal{W}^m, \mathcal{Z}^m$ , we know that  $\mathcal{NF} \subseteq (\mathcal{W}^m \cup \mathcal{Z}^m) \cup \mathcal{X}^m \cup \mathcal{Y}^m$ . Since  $V^C$  is different from any cluster in  $\mathcal{X}^C \cup \mathcal{Y}^C$ , we can conclude that  $\mathcal{NF} \subseteq \mathcal{W}^m \cup \mathcal{Z}^m$ . Since,  $\mathcal{X}^m \not\perp_{\sigma^m} \mathcal{Y}^m \mid \mathcal{W}^m, \mathcal{Z}^m$ , we know that  $(\sigma^m \setminus \text{Root}(\sigma^m)) \cap (\mathcal{W}^m \cup \mathcal{Z}^m) = \emptyset$ . Therefore, all elements in  $\mathcal{NF}$  are roots in  $\sigma^m$ . By Proposition 7 and since mutilations are done at cluster level, we know that for all arrows  $W_w \rightarrow V_v$  with  $V_v \in \mathcal{NF}$ ,  $\mathcal{G}_{\mathcal{W}^m, \mathcal{M}_i^m}^m$  also contains the arrow  $W_w \rightarrow V_{\max \mathcal{NF}}$ . Therefore,  $\mathcal{G}_{\mathcal{W}^m, \mathcal{M}_i^m}^m$  also contains a structure of interest  $\sigma^{m'}$  which is equal to  $\sigma^m$  except that all arrows  $W_w \rightarrow V_v$  with  $V_v \in \mathcal{NF}$  are now pointing toward  $V_{\max \mathcal{NF}}$ . Therefore,  $V_{\max \mathcal{NF}}$  is the only element of  $\sigma^{m'} \cap V^m$  that has incoming arrows. Therefore, in this case, we can assume that  $\#\mathcal{NF} = 1$ .
- Otherwise, every element in  $\mathcal{NF}$  has an outgoing arrow in  $\sigma^m$ . Since  $\sigma^m$  is a structure of interest, we know that  $\sigma^m$  contains a path  $\pi^m$  from  $\mathcal{X}^m$  to  $\mathcal{Y}^m$ . We will construct a graph  $\sigma^{m'}$ , satisfying the following conditions:

- $\sigma^m \subseteq \sigma^{m'} \subseteq \mathcal{G}_{\mathcal{W}^m, \mathcal{M}_i^m}^m$
- $\text{Root}(\sigma^{m'}) = \text{Root}(\sigma^m)$
- $\sigma^{m'}$  differs from  $\sigma^m$  only inside  $V^m$ .

and such that  $\sigma^{m'}$  contains a path  $\pi^{m'}$  from  $\mathcal{X}^m$  to  $\mathcal{Y}^m$  which encounters  $\mathcal{NF}$  at most once with a chain or a collider and that this intersection occurs at  $V_{\max \mathcal{NF}}$ . If  $\sigma^m$  and  $\pi^m$  does not satisfy these conditions, let us consider  $a_1$  and  $a_2$  be respectively the first and last arrows of  $\pi^m$  in  $\mathcal{NF}$ . We distinguish the cases:

1. If both  $a_1$  and  $a_2$  are incoming arrows in  $\mathcal{NF}$ , i.e  $\pi^m = \dots W_w \bullet \rightarrow V_{v^1}^1 \dots V_{v^2}^2 \bullet \leftarrow U_u \dots$ . By Proposition 7 and since mutilations are done at cluster level, we know that  $\mathcal{G}_{\mathcal{W}^m, \mathcal{M}_i^m}^m$  contains the arrows  $W_w \bullet \rightarrow V_{\max \mathcal{NF}}$  and  $V_{\max \mathcal{NF}} \bullet \leftarrow U_u$ . We consider  $\sigma^{m'} := \sigma^m \cup \{W_w \bullet \rightarrow V_{\max \mathcal{NF}}\} \cup \{V_{\max \mathcal{NF}} \bullet \leftarrow U_u\}$  and  $\pi^{m'} := \pi_{[\mathcal{X}^m, W_w]}^m \cup \{W_w \bullet \rightarrow V_{\max \mathcal{NF}} \bullet \leftarrow U_u\} \cup \pi_{[U_u, \mathcal{Y}^m]}^m$ . Note that  $\pi^{m'}$  encounters  $\mathcal{NF}$  only at  $V_{\max \mathcal{NF}}$  and that  $\text{Root}(\sigma^{m'}) = \text{Root}(\sigma^m)$ .
2. If both  $a_1$  and  $a_2$  are outgoing arrows in  $\mathcal{NF}$ , i.e  $\pi^m = \dots W_w \bullet \leftarrow V_{v^1}^1 \dots V_{v^2}^2 \bullet \rightarrow U_u \dots$ . By Proposition 6 and since mutilations are done at cluster level, we know that  $\mathcal{G}_{\mathcal{W}^m, \mathcal{M}_i^m}^m$  contains the arrows  $W_w \bullet \leftarrow V_1$  and  $V_1 \bullet \rightarrow U_u$ . We consider  $\sigma^{m'} := \sigma^m \cup \{W_w \bullet \leftarrow V_1\} \cup \{V_1 \bullet \rightarrow U_u\}$  and  $\pi^{m'} := \pi_{[\mathcal{X}^m, W_w]}^m \cup \{W_w \bullet \leftarrow V_1 \bullet \rightarrow U_u\} \cup \pi_{[U_u, \mathcal{Y}^m]}^m$ . Note that  $\pi^{m'}$  does not encounter  $\mathcal{NF}$  and that  $\text{Root}(\sigma^{m'}) = \text{Root}(\sigma^m)$ .
3. Otherwise, without loss of generality, we can assume that  $a_1$  and  $a_2$  are pointing towards  $\mathcal{Y}^m$ , i.e.  $\pi^m = \dots W_w \bullet \rightarrow V_{v^1}^1 \dots V_{v^2}^2 \bullet \rightarrow U_u \dots$ . Indeed, otherwise, we just need to consider the path from  $\mathcal{Y}^m$  to  $\mathcal{X}^m$ . Note that  $V_{v^1}^1$  or  $V_{v^2}^2$  could be equal to  $V_{\max \mathcal{NF}}$  but not both. Since all elements in  $\mathcal{NF}$  have an outgoing arrow, let us consider  $C_c$ , the child

of  $V_{\max \mathcal{NF}}$  in  $\sigma^m$ . By Propositions 6, 7 and since mutilations are done at cluster level, we know that  $\mathcal{G}_{\mathcal{U} \overline{\mathcal{W}^m}, \mathcal{M}_i^m}$  contains the arrows  $W_w \bullet \rightarrow V_{\max \mathcal{NF}}$  and  $C_c \leftarrow \bullet V_{v^2}^2$ . We consider  $\sigma^{m'} := \sigma^m \cup \{W_w \bullet \rightarrow V_{\max \mathcal{NF}}\} \cup \{C_c \leftarrow \bullet V_{v^2}^2\}$  and  $\pi^{m'} := \pi_{[\mathcal{X}^m, W_w]}^m \cup \{W_w \bullet \rightarrow V_{\max \mathcal{NF}} \rightarrow C_c \leftarrow \bullet V_{v^2}^2\} \cup \pi_{[V_{v^2}^2, \mathcal{Y}^m]}^m$ . Note that  $\pi^{m'}$  encounters  $\mathcal{NF}$  only once with a collider in  $V_{\max \mathcal{NF}}$  and once with a fork in  $V_{v^2}^2$  and that  $\text{Root}(\sigma^{m'}) = \text{Root}(\sigma^m)$ .

Note that in all cases, we have used Propositions 6 and 7, thus  $\sigma^{m'} \cup \mathcal{G}_{\text{can}}^m$  is acyclic. Moreover, in all cases,  $\text{Root}(\sigma^{m'}) = \text{Root}(\sigma^m)$ . Therefore,  $\text{Root}(\sigma^{m'}) \subseteq \mathcal{R}_i^m$ . In addition,  $\sigma^{m'}$  contains  $\pi^{m'}$ , a path from  $\mathcal{X}^m$  to  $\mathcal{Y}^m$  which encounters  $\mathcal{NF}$  at most once with a chain or a collider and that this intersection occurs a  $V_{\max \mathcal{NF}}$ .

However, in Cases 2 and 3, we have added outgoing arrows to some vertices different from  $V_{\max \mathcal{NF}}$ . This could prevent  $\sigma^{m'}$  from being a structure of interest. We apply the following transformation to construct a structure of interest from  $\sigma^{m'}$ :

1. **Move all incoming arrows to  $V_{\max \mathcal{NF}}$** : By Proposition 7 and since mutilations are done at cluster level, we know that for all arrows  $W_w \rightarrow V_v$  with  $V_v \in \mathcal{NF}$ ,  $\mathcal{G}_{\mathcal{U} \overline{\mathcal{W}^m}, \mathcal{M}_i^m}$  also contains the arrow  $W_w \rightarrow V_{\max \mathcal{NF}}$ . Therefore,  $\mathcal{G}_{\mathcal{U} \overline{\mathcal{W}^m}, \mathcal{M}_i^m}$  also contains  $\sigma^{m''}$  which is equal to  $\sigma^{m'}$  except that all arrows  $W_w \rightarrow V_v$  with  $V_v \in \mathcal{NF}$  are now pointing toward  $V_{\max \mathcal{NF}}$ . Since we are using Proposition 7, we know that  $\sigma^{m''} \cup \mathcal{G}_{\text{can}}^m$  is acyclic. Note that  $\pi^{m'}$  still exists in  $\sigma^{m''}$  and that all vertices in  $\sigma^{m''} \cap V^m$  except  $V_{\max \mathcal{NF}}$  have no incoming arrows in  $\sigma^{m''}$ . Moreover, note that  $\text{Root}(\sigma^{m''}) = \text{Root}(\sigma^{m'})$ .
2. **Remove problematic outgoing arrows**: To keep the notations simple, we update  $\sigma^{m'} \leftarrow \sigma^{m''}$ . Some vertices, different from  $V_{\max \mathcal{NF}}$ , may have more than two outgoing arrows, preventing  $\sigma^{m'}$  from being a structure of interest. We remove from  $\sigma^{m'}$ , all outgoing arrow from  $V^m$  that is not used by  $\pi^{m'}$ . Since,  $\pi^{m'}$  uses at most two arrows around a vertex, we know that all vertices have now at most two outgoing arrows. Since we have just removed some arrows, we know that  $\sigma^{m'} \cup \mathcal{G}_{\text{can}}^m$  remains acyclic. Moreover, since  $\pi^{m'}$  is preserved, we know that  $\mathcal{X}^m$  and  $\mathcal{Y}^m$  are still connected.
3. **Remove the problematic vertices**: At the end of the previous steps, some vertices are not connected to the others in  $\sigma^{m'}$ , preventing  $\sigma^{m'}$  from being a structure of interest. More precisely, these vertices are  $\mathcal{NF} \setminus \{V_{\max \mathcal{NF}}\}$  except  $V_1$  in case 2 and except  $V_{v^2}^2$  in case 3. Indeed, at step 1, they have lost their incoming arrows and at step 2, they have lost their outgoing arrows. We remove these vertices from  $\sigma^{m'}$ . By doing so,  $\sigma^{m'} \cup \mathcal{G}_{\text{can}}^m$  remains acyclic and  $\sigma^{m'}$  is now a structure of interest,  $\text{Root}(\sigma^{m'}) = \text{Root}(\sigma^m) \subseteq \mathcal{R}_i^m$ .

To summarize, we have constructed a structure of interest  $\sigma^{m'}$  in  $\mathcal{G}_{\mathcal{U} \overline{\mathcal{W}^m}, \mathcal{M}_i^m}$ , such that  $\mathcal{X}^m \not\perp_{\sigma^{m'}, \mathcal{Y}^m} \mid \mathcal{W}^m, \mathcal{Z}^m, \mathcal{G}_{\text{can}}^m \cup \sigma^{m'}$  is acyclic and  $\text{Root}(\sigma^{m'}) \subseteq \mathcal{R}_i^m$ . Moreover,  $V_{\max \mathcal{NF}}$  is the only element of  $V^m \cap \sigma^{m'}$  with incoming arrows. Therefore, in this case, we can assume that  $\#\mathcal{NF} = 1$ .

Therefore, in all cases, we can assume that  $\#\mathcal{NF} \leq 1$  without loss of generality.

**We will now show that we can assume that  $\mathcal{F} \subseteq \{V_1\}$  without loss of generality.** If it is not the case we apply the following transformations:

1. **Move all arrows to  $V_1$** : By Proposition 6 and since mutilations are done at cluster level, for all arrow  $V_v \rightarrow W_w$  in  $\mathcal{F} \cap \sigma^m$ , we know that  $\mathcal{G}_{\mathcal{U} \overline{\mathcal{W}^m}, \mathcal{M}_i^m}$  contains the arrow  $V_1 \rightarrow W_w$ . Thus, we consider  $\sigma^{m'}$  the subgraph of  $\mathcal{G}_{\mathcal{U} \overline{\mathcal{W}^m}, \mathcal{M}_i^m}$  obtained by moving all the arrows  $V_v \rightarrow W_w$  with  $V_v$  in  $\mathcal{F} \cap \sigma^m$  to  $V_1 \rightarrow W_w$ . Since,  $\sigma^m$  is a structure of interest, it contains a path  $\pi^m$  from  $\mathcal{X}^m$  to  $\mathcal{Y}^m$ . Note that the above transformation yields a path  $\pi^{m'}$  in  $\sigma^{m'}$  which connects  $\mathcal{X}^m$  and  $\mathcal{Y}^m$ .
2. **Remove problematic outgoing arrows**: In  $\sigma^{m'}$ ,  $V_1$  may have more than two outgoing arrows, preventing  $\sigma^{m'}$  from being a structure of interest. Yet  $\pi^{m'}$  uses at most two of these arrows. Thus, we only keep two of them without altering  $\pi^{m'}$ .

862 **3. Remove the problematic vertices:** At the end of the previous steps, some vertices are not  
 863 connected to the others in  $\sigma^{m'}$ , preventing  $\sigma^{m'}$  from being a structure of interest. More  
 864 precisely, these vertices are  $\mathcal{F} \setminus \{V_1\}$ . Indeed, they have lost their outgoing arrow at step 1  
 865 and had no incoming arrows are they are in  $\mathcal{F}$ .

866 To summarize, we have constructed a structure of interest  $\sigma^{m'}$  in  $\mathcal{G}_{\mathcal{W}^m, \mathcal{M}_i^m}^m$ , such that  $\mathcal{X}^m \not\perp_{\sigma^{m'}} \mathcal{Y}^m \mid$   
 867  $\mathcal{W}^m, \mathcal{Z}^m, \mathcal{G}_{\text{can}}^m \cup \sigma^{m'}$  is acyclic and  $\text{Root}(\sigma^{m'}) \subseteq \mathcal{R}_i^m$ . Moreover,  $V_1$  is the only element of  $V^m \cap \sigma^{m'}$   
 868 with no incoming arrows. Therefore, we can assume that  $\mathcal{F} \subseteq \{V_1\}$ .

869 **End of the proof of 1  $\Rightarrow$  2:** Without loss of generality, we assume that  $\#\mathcal{NF} \leq 1$  and  $\mathcal{F} \subseteq \{V_1\}$ .  
 870 Let  $V_{\mathcal{NF}}$  be the only element of  $\mathcal{NF}$  (if exists). We consider the graph  $\mathcal{G}^m := \mathcal{G}_{\text{can}}^m \cup \sigma^m$ . By  
 871 Corollary 3,  $R_i(\mathcal{W}^m, \mathcal{X}^m, \mathcal{Y}^m, \mathcal{Z}^m)$  does not hold in  $\mathcal{G}^m$  and by construction  $\mathcal{G}^m$  is compatible with  
 872  $\mathcal{G}^C$ . For every vertex in  $V^m \setminus (\mathcal{F} \cup \mathcal{NF})$ , we apply Proposition 6 to move all outgoing arrows to  $V_1$   
 873 and Proposition 7 to move all incoming arrows to  $V_{\#V^C}$ . This yields a graph  $\mathcal{G}^{m'} \in C(\mathcal{G}^C)$  in which  
 874  $R_i(\mathcal{W}^m, \mathcal{X}^m, \mathcal{Y}^m, \mathcal{Z}^m)$  does not hold, and where no vertex outside  $\mathcal{NF} \cup \{V_1\} \cup \{V_{\#V^C}\}$  is incident to  
 875 an arrow.

876 We repeat this construction for each cluster, ultimately obtaining  $\mathcal{G}^{m*}$ , where  $R_i(\mathcal{W}^m, \mathcal{X}^m, \mathcal{Y}^m, \mathcal{Z}^m)$   
 877 still fails and every cluster has arrows on at most three vertices. Finally, by removing all vertices  
 878 that are not incident to any arrow in  $\mathcal{G}^{m*}$ , we obtain  $\mathcal{G}^{m*}_{\leq 3}$ , a graph compatible with  $\mathcal{G}^C_{\leq 3}$  in which  
 879  $R_i(\mathcal{W}^m_{\leq 3}, \mathcal{X}^m_{\leq 3}, \mathcal{Y}^m_{\leq 3}, \mathcal{Z}^m_{\leq 3})$  does not hold.

880 Therefore, there exists  $\mathcal{G}^m_{\leq 3} \in C(\mathcal{G}^C_{\leq 3})$  in which  $R_i(\mathcal{W}^m_{\leq 3}, \mathcal{X}^m_{\leq 3}, \mathcal{Y}^m_{\leq 3}, \mathcal{Z}^m_{\leq 3})$  does not hold.  $\square$

881 We come back to the example presented in Figure 3 to illustrate the successive steps of this proof  
 882 in Figure 9. Particularly, Figure 9a is the initial graph, then in Figure 9b we consider an analogous  
 883 structure of interest such that  $\#\mathcal{NF} \leq 1$ . Then, in Figure 9c, we consider an analogous structure of  
 884 interest such that  $\mathcal{F} \subseteq \{V_1\}$ . Finally, in Figure 9d we move every unused gray arrows such that only  
 885 three vertices of  $B^m$  are incident to any arrows. From this graph, we deduce  $\mathcal{G}^m_{\leq 3}$  in Figure 9e on  
 886 which d-connection with structures of interests are equivalent. We apply equivalent rules to get 9f,  
 887 which corresponds to Figure 3.



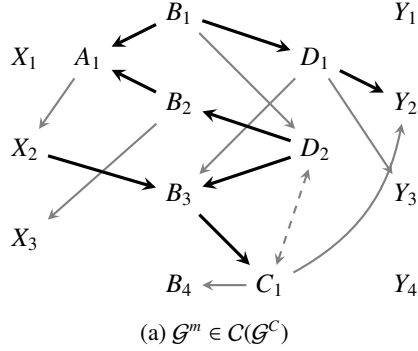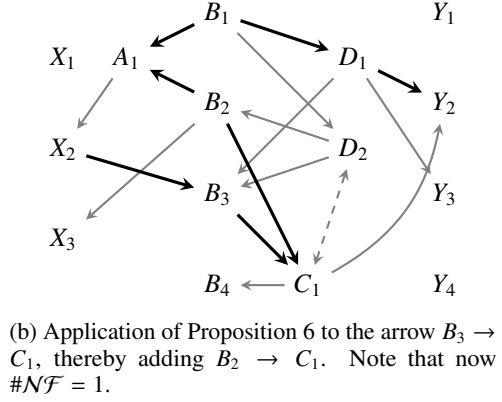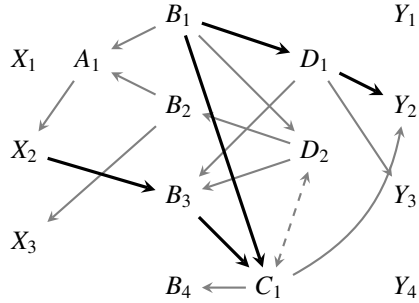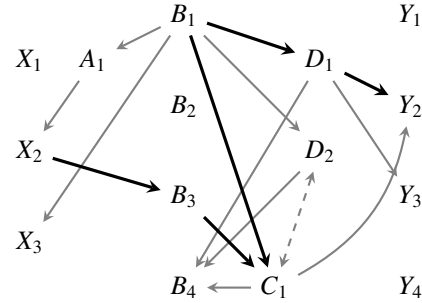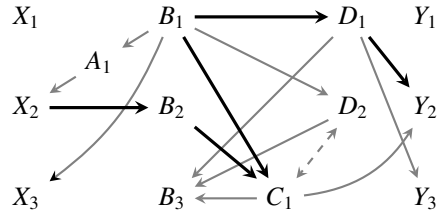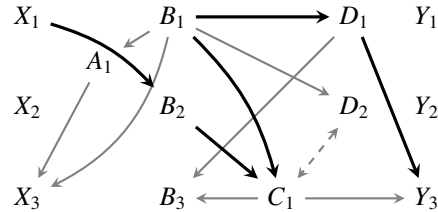

Figure 9: Figure 9a shows the graph  $\mathcal{G}^m$  containing the structure of interest  $\sigma^m$  (in bold black), which connects  $X^m$  and  $Y^m$  under  $C^m \cup A^m$ . Figures 9b, 9c and 9d illustrate the successive transformations of  $\mathcal{G}^m$  and  $\sigma^m$  (as carried out in the proof of Theorem 4) for the cluster  $B^C$ . Figure 9e shows the last step of the proof. Figure 9f shows how to transform the graph in Figure 9e to get the graph in Figure 3d.

## NeurIPS Paper Checklist

### 1. Claims

Question: Do the main claims made in the abstract and introduction accurately reflect the paper's contributions and scope?

Answer: [\[Yes\]](#)

Justification: Main claims are listed in the introduction at line 62. They correspond to the outline of the paper.

Guidelines:

- The answer NA means that the abstract and introduction do not include the claims made in the paper.
- The abstract and/or introduction should clearly state the claims made, including the contributions made in the paper and important assumptions and limitations. A No or NA answer to this question will not be perceived well by the reviewers.
- The claims made should match theoretical and experimental results, and reflect how much the results can be expected to generalize to other settings.
- It is fine to include aspirational goals as motivation as long as it is clear that these goals are not attained by the paper.

### 2. Limitations

Question: Does the paper discuss the limitations of the work performed by the authors?

Answer: [\[Yes\]](#)

Justification: Limitations are discussed in the conclusion.

Guidelines:

- The answer NA means that the paper has no limitation while the answer No means that the paper has limitations, but those are not discussed in the paper.
- The authors are encouraged to create a separate "Limitations" section in their paper.
- The paper should point out any strong assumptions and how robust the results are to violations of these assumptions (e.g., independence assumptions, noiseless settings, model well-specification, asymptotic approximations only holding locally). The authors should reflect on how these assumptions might be violated in practice and what the implications would be.
- The authors should reflect on the scope of the claims made, e.g., if the approach was only tested on a few datasets or with a few runs. In general, empirical results often depend on implicit assumptions, which should be articulated.
- The authors should reflect on the factors that influence the performance of the approach. For example, a facial recognition algorithm may perform poorly when image resolution is low or images are taken in low lighting. Or a speech-to-text system might not be used reliably to provide closed captions for online lectures because it fails to handle technical jargon.
- The authors should discuss the computational efficiency of the proposed algorithms and how they scale with dataset size.
- If applicable, the authors should discuss possible limitations of their approach to address problems of privacy and fairness.
- While the authors might fear that complete honesty about limitations might be used by reviewers as grounds for rejection, a worse outcome might be that reviewers discover limitations that aren't acknowledged in the paper. The authors should use their best judgment and recognize that individual actions in favor of transparency play an important role in developing norms that preserve the integrity of the community. Reviewers will be specifically instructed to not penalize honesty concerning limitations.

### 3. Theory assumptions and proofs

Question: For each theoretical result, does the paper provide the full set of assumptions and a complete (and correct) proof?

Answer: [\[Yes\]](#)

Justification: All assumptions are described and all proofs are given in the Appendix.

Guidelines:

- The answer NA means that the paper does not include theoretical results.
- All the theorems, formulas, and proofs in the paper should be numbered and cross-referenced.
- All assumptions should be clearly stated or referenced in the statement of any theorems.
- The proofs can either appear in the main paper or the supplemental material, but if they appear in the supplemental material, the authors are encouraged to provide a short Sketch of proof to provide intuition.
- Inversely, any informal proof provided in the core of the paper should be complemented by formal proofs provided in appendix or supplemental material.
- Theorems and Lemmas that the proof relies upon should be properly referenced.

#### 4. Experimental result reproducibility

Question: Does the paper fully disclose all the information needed to reproduce the main experimental results of the paper to the extent that it affects the main claims and/or conclusions of the paper (regardless of whether the code and data are provided or not)?

Answer: [NA]

Justification: The paper does not include experiments.

Guidelines:

- The answer NA means that the paper does not include experiments.
- If the paper includes experiments, a No answer to this question will not be perceived well by the reviewers: Making the paper reproducible is important, regardless of whether the code and data are provided or not.
- If the contribution is a dataset and/or model, the authors should describe the steps taken to make their results reproducible or verifiable.
- Depending on the contribution, reproducibility can be accomplished in various ways. For example, if the contribution is a novel architecture, describing the architecture fully might suffice, or if the contribution is a specific model and empirical evaluation, it may be necessary to either make it possible for others to replicate the model with the same dataset, or provide access to the model. In general, releasing code and data is often one good way to accomplish this, but reproducibility can also be provided via detailed instructions for how to replicate the results, access to a hosted model (e.g., in the case of a large language model), releasing of a model checkpoint, or other means that are appropriate to the research performed.
- While NeurIPS does not require releasing code, the conference does require all submissions to provide some reasonable avenue for reproducibility, which may depend on the nature of the contribution. For example
  - (a) If the contribution is primarily a new algorithm, the paper should make it clear how to reproduce that algorithm.
  - (b) If the contribution is primarily a new model architecture, the paper should describe the architecture clearly and fully.
  - (c) If the contribution is a new model (e.g., a large language model), then there should either be a way to access this model for reproducing the results or a way to reproduce the model (e.g., with an open-source dataset or instructions for how to construct the dataset).
  - (d) We recognize that reproducibility may be tricky in some cases, in which case authors are welcome to describe the particular way they provide for reproducibility. In the case of closed-source models, it may be that access to the model is limited in some way (e.g., to registered users), but it should be possible for other researchers to have some path to reproducing or verifying the results.

#### 5. Open access to data and code

Question: Does the paper provide open access to the data and code, with sufficient instructions to faithfully reproduce the main experimental results, as described in supplemental material?

Answer: [NA]

Justification: The paper does not include experiments requiring code.

Guidelines:

- The answer NA means that paper does not include experiments requiring code.
- Please see the NeurIPS code and data submission guidelines (<https://nips.cc/public/guides/CodeSubmissionPolicy>) for more details.
- While we encourage the release of code and data, we understand that this might not be possible, so “No” is an acceptable answer. Papers cannot be rejected simply for not including code, unless this is central to the contribution (e.g., for a new open-source benchmark).
- The instructions should contain the exact command and environment needed to run to reproduce the results. See the NeurIPS code and data submission guidelines (<https://nips.cc/public/guides/CodeSubmissionPolicy>) for more details.
- The authors should provide instructions on data access and preparation, including how to access the raw data, preprocessed data, intermediate data, and generated data, etc.
- The authors should provide scripts to reproduce all experimental results for the new proposed method and baselines. If only a subset of experiments are reproducible, they should state which ones are omitted from the script and why.
- At submission time, to preserve anonymity, the authors should release anonymized versions (if applicable).
- Providing as much information as possible in supplemental material (appended to the paper) is recommended, but including URLs to data and code is permitted.

## 6. Experimental setting/details

Question: Does the paper specify all the training and test details (e.g., data splits, hyper-parameters, how they were chosen, type of optimizer, etc.) necessary to understand the results?

Answer: [NA]

Justification: The paper does not include experiments.

Guidelines:

- The answer NA means that the paper does not include experiments.
- The experimental setting should be presented in the core of the paper to a level of detail that is necessary to appreciate the results and make sense of them.
- The full details can be provided either with the code, in appendix, or as supplemental material.

## 7. Experiment statistical significance

Question: Does the paper report error bars suitably and correctly defined or other appropriate information about the statistical significance of the experiments?

Answer: [NA]

Justification: The paper does not include experiments.

Guidelines:

- The answer NA means that the paper does not include experiments.
- The authors should answer "Yes" if the results are accompanied by error bars, confidence intervals, or statistical significance tests, at least for the experiments that support the main claims of the paper.
- The factors of variability that the error bars are capturing should be clearly stated (for example, train/test split, initialization, random drawing of some parameter, or overall run with given experimental conditions).
- The method for calculating the error bars should be explained (closed form formula, call to a library function, bootstrap, etc.)
- The assumptions made should be given (e.g., Normally distributed errors).
- It should be clear whether the error bar is the standard deviation or the standard error of the mean.

- It is OK to report 1-sigma error bars, but one should state it. The authors should preferably report a 2-sigma error bar than state that they have a 96% CI, if the hypothesis of Normality of errors is not verified.
- For asymmetric distributions, the authors should be careful not to show in tables or figures symmetric error bars that would yield results that are out of range (e.g. negative error rates).
- If error bars are reported in tables or plots, The authors should explain in the text how they were calculated and reference the corresponding figures or tables in the text.

## 8. Experiments compute resources

Question: For each experiment, does the paper provide sufficient information on the computer resources (type of compute workers, memory, time of execution) needed to reproduce the experiments?

Answer: [NA]

Justification: The paper does not include experiments.

Guidelines:

- The answer NA means that the paper does not include experiments.
- The paper should indicate the type of compute workers CPU or GPU, internal cluster, or cloud provider, including relevant memory and storage.
- The paper should provide the amount of compute required for each of the individual experimental runs as well as estimate the total compute.
- The paper should disclose whether the full research project required more compute than the experiments reported in the paper (e.g., preliminary or failed experiments that didn't make it into the paper).

## 9. Code of ethics

Question: Does the research conducted in the paper conform, in every respect, with the NeurIPS Code of Ethics <https://neurips.cc/public/EthicsGuidelines>?

Answer: [Yes]

Justification: The paper conform, in every respect, with the NeurIPS Code of Ethics

Guidelines:

- The answer NA means that the authors have not reviewed the NeurIPS Code of Ethics.
- If the authors answer No, they should explain the special circumstances that require a deviation from the Code of Ethics.
- The authors should make sure to preserve anonymity (e.g., if there is a special consideration due to laws or regulations in their jurisdiction).

## 10. Broader impacts

Question: Does the paper discuss both potential positive societal impacts and negative societal impacts of the work performed?

Answer: [NA]

Justification: The paper is a theoretical study of completeness of calculus.

Guidelines:

- The answer NA means that there is no societal impact of the work performed.
- If the authors answer NA or No, they should explain why their work has no societal impact or why the paper does not address societal impact.
- Examples of negative societal impacts include potential malicious or unintended uses (e.g., disinformation, generating fake profiles, surveillance), fairness considerations (e.g., deployment of technologies that could make decisions that unfairly impact specific groups), privacy considerations, and security considerations.
- The conference expects that many papers will be foundational research and not tied to particular applications, let alone deployments. However, if there is a direct path to any negative applications, the authors should point it out. For example, it is legitimate to point out that an improvement in the quality of generative models could be used to

1097 generate deepfakes for disinformation. On the other hand, it is not needed to point out  
1098 that a generic algorithm for optimizing neural networks could enable people to train  
1099 models that generate Deepfakes faster.

- 1100 • The authors should consider possible harms that could arise when the technology is  
1101 being used as intended and functioning correctly, harms that could arise when the  
1102 technology is being used as intended but gives incorrect results, and harms following  
1103 from (intentional or unintentional) misuse of the technology.
- 1104 • If there are negative societal impacts, the authors could also discuss possible mitigation  
1105 strategies (e.g., gated release of models, providing defenses in addition to attacks,  
1106 mechanisms for monitoring misuse, mechanisms to monitor how a system learns from  
1107 feedback over time, improving the efficiency and accessibility of ML).

## 11. Safeguards

1109 Question: Does the paper describe safeguards that have been put in place for responsible  
1110 release of data or models that have a high risk for misuse (e.g., pretrained language models,  
1111 image generators, or scraped datasets)?

1112 Answer: [NA]

1113 Justification: The paper poses no such risks.

1114 Guidelines:

- 1115 • The answer NA means that the paper poses no such risks.
- 1116 • Released models that have a high risk for misuse or dual-use should be released with  
1117 necessary safeguards to allow for controlled use of the model, for example by requiring  
1118 that users adhere to usage guidelines or restrictions to access the model or implementing  
1119 safety filters.
- 1120 • Datasets that have been scraped from the Internet could pose safety risks. The authors  
1121 should describe how they avoided releasing unsafe images.
- 1122 • We recognize that providing effective safeguards is challenging, and many papers do  
1123 not require this, but we encourage authors to take this into account and make a best  
1124 faith effort.

## 12. Licenses for existing assets

1126 Question: Are the creators or original owners of assets (e.g., code, data, models), used in  
1127 the paper, properly credited and are the license and terms of use explicitly mentioned and  
1128 properly respected?

1129 Answer: [NA]

1130 Justification: The paper does not use existing assets.

1131 Guidelines:

- 1132 • The answer NA means that the paper does not use existing assets.
- 1133 • The authors should cite the original paper that produced the code package or dataset.
- 1134 • The authors should state which version of the asset is used and, if possible, include a  
1135 URL.
- 1136 • The name of the license (e.g., CC-BY 4.0) should be included for each asset.
- 1137 • For scraped data from a particular source (e.g., website), the copyright and terms of  
1138 service of that source should be provided.
- 1139 • If assets are released, the license, copyright information, and terms of use in the  
1140 package should be provided. For popular datasets, [paperswithcode.com/datasets](https://paperswithcode.com/datasets)  
1141 has curated licenses for some datasets. Their licensing guide can help determine the  
1142 license of a dataset.
- 1143 • For existing datasets that are re-packaged, both the original license and the license of  
1144 the derived asset (if it has changed) should be provided.
- 1145 • If this information is not available online, the authors are encouraged to reach out to  
1146 the asset's creators.

## 13. New assets

1148 Question: Are new assets introduced in the paper well documented and is the documentation  
1149 provided alongside the assets?

1150 Answer: [NA]

1151 Justification: The paper does not release new assets.

1152 Guidelines:

- 1153 • The answer NA means that the paper does not release new assets.
- 1154 • Researchers should communicate the details of the dataset/code/model as part of their
- 1155 submissions via structured templates. This includes details about training, license,
- 1156 limitations, etc.
- 1157 • The paper should discuss whether and how consent was obtained from people whose
- 1158 asset is used.
- 1159 • At submission time, remember to anonymize your assets (if applicable). You can either
- 1160 create an anonymized URL or include an anonymized zip file.

1161 **14. Crowdsourcing and research with human subjects**

1162 Question: For crowdsourcing experiments and research with human subjects, does the paper

1163 include the full text of instructions given to participants and screenshots, if applicable, as

1164 well as details about compensation (if any)?

1165 Answer: [NA]

1166 Justification: The paper does not involve crowdsourcing nor research with human subjects.

1167 Guidelines:

- 1168 • The answer NA means that the paper does not involve crowdsourcing nor research with
- 1169 human subjects.
- 1170 • Including this information in the supplemental material is fine, but if the main contribu-
- 1171 tion of the paper involves human subjects, then as much detail as possible should be
- 1172 included in the main paper.
- 1173 • According to the NeurIPS Code of Ethics, workers involved in data collection, curation,
- 1174 or other labor should be paid at least the minimum wage in the country of the data
- 1175 collector.

1176 **15. Institutional review board (IRB) approvals or equivalent for research with human**

1177 **subjects**

1178 Question: Does the paper describe potential risks incurred by study participants, whether

1179 such risks were disclosed to the subjects, and whether Institutional Review Board (IRB)

1180 approvals (or an equivalent approval/review based on the requirements of your country or

1181 institution) were obtained?

1182 Answer: [NA]

1183 Justification: The paper does not involve crowdsourcing nor research with human subjects.

1184 Guidelines:

- 1185 • The answer NA means that the paper does not involve crowdsourcing nor research with
- 1186 human subjects.
- 1187 • Depending on the country in which research is conducted, IRB approval (or equivalent)
- 1188 may be required for any human subjects research. If you obtained IRB approval, you
- 1189 should clearly state this in the paper.
- 1190 • We recognize that the procedures for this may vary significantly between institutions
- 1191 and locations, and we expect authors to adhere to the NeurIPS Code of Ethics and the
- 1192 guidelines for their institution.
- 1193 • For initial submissions, do not include any information that would break anonymity (if
- 1194 applicable), such as the institution conducting the review.

1195 **16. Declaration of LLM usage**

1196 Question: Does the paper describe the usage of LLMs if it is an important, original, or

1197 non-standard component of the core methods in this research? Note that if the LLM is used

1198 only for writing, editing, or formatting purposes and does not impact the core methodology,

1199 scientific rigorousness, or originality of the research, declaration is not required.

1200 Answer: [NA]

1201 Justification: The core method development in this research does not involve LLMs as any  
1202 important, original, or non-standard components.

1203 Guidelines:

- 1204 • The answer NA means that the core method development in this research does not  
1205 involve LLMs as any important, original, or non-standard components.
- 1206 • Please refer to our LLM policy (<https://neurips.cc/Conferences/2025/LLM>)  
1207 for what should or should not be described.
